# Supplementary material for: Rhodium-catalyzed enone carbonyl directed C–H activation for the synthesis of indanones containing all-carbon quaternary centers
Source: Royal Society of Chemistry journal article supplement (doi:10.1039/d1qo00056j), 2021-01-01

## Supporting Information

### **Rhodium-catalyzed enone carbonyl directed C–H activation for synthesis of indanones containing all-carbon quaternary centers**

Jiang Lou,<sup>a,b,+</sup> Wenjia Han,<sup>a,b,+</sup> Zhuqing Liu<sup>\*b,c</sup>, Jiaqi Xiao<sup>\*b,c</sup>

<sup>a</sup> Key Laboratory of Pulp and Paper Science & Technology of Ministry of Education, Qilu University of Technology, Shandong Academy of Sciences, Jinan 250353, P. R. China.

<sup>b</sup> State Key Laboratory of Biobased Material and Green Papermaking, Qilu University of Technology, Shandong Academy of Sciences, Jinan 250353, P. R. China.

<sup>c</sup> Advanced Research Institute for Multidisciplinary Science, Qilu University of Technology, Shandong Academy of Sciences, Jinan 250353, P. R. China.

liuzhuqing@qlu.edu.cn; jiaqixiao@qlu.edu.cn

### **Experimental procedures and analytical data**

| Contents:                         | Page |
|-----------------------------------|------|
| 1. General considerations         | 2    |
| 2. Experimental procedures        | 3    |
| 3. X–Ray crystallographic studies | 8    |
| 4. Analytical data                | 11   |
| 5. Copies of NMR spectra          | 20   |

---

## 1. General considerations

The solvents were dried and distilled prior to use by the literature methods.  $^1\text{H}$  and  $^{13}\text{C}\{^1\text{H}\}$  NMR spectra were recorded on a 400 MHz spectrometer and all chemical shift values refer to  $\text{CDCl}_3$  ( $\delta$  ( $^1\text{H}$ ), 7.26 ppm;  $\delta$  ( $^{13}\text{C}$ ), 77.16 ppm). High resolution mass spectra were measured on a Waters GC-TOF CA156 mass spectrometer. All the melting points were measured and uncorrected. X-Ray crystallographic analysis was achieved by the Analysis Center, Dalian Institute of Chemical Physics, Chinese Academy of Sciences. Analytical TLC plates were viewed by UV light (254 nm). Column chromatographic purifications were performed on SDZF silica gel 160. The starting chemical reagents were purchased from commercial sources and used as received unless otherwise indicated.  $\alpha$ -Oxo ketene dithioacetals **1a-n**,<sup>1</sup> **1o**,<sup>2</sup> **1p**,<sup>3</sup> and diazo compounds **2**<sup>4</sup> were prepared by the reported methods.

## References

- (1) (a) J. He, Z. Man, Y. Shi and C.-Y. Li, Synthesis of  $\beta$ -Amino- $\alpha,\beta$ -unsaturated Ketone Derivatives via Sequential Rhodium-Catalyzed Sulfur Ylide Formation/Rearrangement, *J. Org. Chem.*, 2015, **80**, 4816; (b) P. Wu, L. Wang, K. Wu and Z. Yu, Brønsted Acid Catalyzed PhSe Transfer versus Radical Aryl Transfer: Linear Codimerization of Styrenes and Internal Olefins, *Org. Lett.*, 2015, **17**, 868; (c) Z. Fu, M. Wang, Y. Dong, J. Liu and Q. Liu, Direct Synthesis of Highly Substituted 2-Cyclohexenones and Sterically Hindered Benzophenones Based on a [5C+1C] Annulation, *J. Org. Chem.*, 2009, **74**, 6105.
- (2) X. Zhao, F. Zhang, K. Liu, X. Zhang and H. Lv, Nickel-Catalyzed Chemoselective Asymmetric Hydrogenation of  $\alpha,\beta$ -Unsaturated Ketoimines: An Efficient Approach to Chiral Allylic Amines, *Org. Lett.*, 2019, **21**, 8966.
- (3) S. Zhou, B.-Y. Yan, S.-X. Fan, J.-S. Tian and T.-P. Loh, Regioselective Formal [4+2] Cycloadditions of Enaminones with Diazocarbonyls through  $\text{Rh}^{\text{III}}$ -Catalyzed C–H Bond Functionalization, *Org. Lett.*, 2018, **20**, 3975.
- (4) P. Li, X. Xu, J. Chen, H. Yao and A. Lin, Rh(III)-Catalyzed Synthesis of Pyrazolo[1,2-*a*]cinnolines from Pyrazolidinones and Diazo Compounds, *Org. Chem. Front.*, 2018, **5**, 1777.

## 2. Experimental procedures

## 2.1 Optimization of the reaction conditions

A mixture of **1a** (44.9 mg, 0.2 mmol), diazo compound **2a** (62.5 mg, 0.4 mmol), catalyst, silver salt, oxidant, and additives in 2 mL solvent was vigorously stirred for 24 h under a nitrogen atmosphere. After cooling to ambient temperature, all the volatiles were evaporated under reduced pressure. The resultant residue was purified by silica gel column chromatography on silica gel (eluent: petroleum ether (60–90 °C)/ethyl acetate = 20:1, v/v) to afford product **3a**.

**Table S1. Optimization of the reaction conditions<sup>a</sup>**

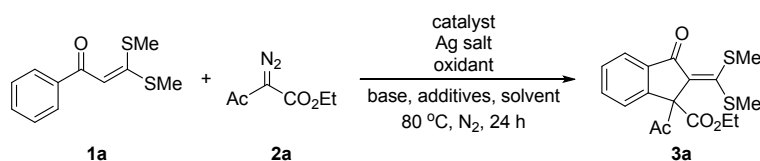

| entry           | catalyst (mol%)                          | Ag salt (mol%)          | oxidant                                | base                            | additives (mol%) | solvent            | yield (%) <sup>b</sup> |
|-----------------|------------------------------------------|-------------------------|----------------------------------------|---------------------------------|------------------|--------------------|------------------------|
| 1               | [Cp*RhCl <sub>2</sub> ] <sub>2</sub> (4) | AgSbF <sub>6</sub> (16) | AgOAc                                  | NaOAc                           |                  | DCE                | 19                     |
| 2               | [Cp*RhCl <sub>2</sub> ] <sub>2</sub> (4) | AgSbF <sub>6</sub> (16) | AgOAc                                  | LiOAc                           |                  | DCE                | 34                     |
| 3               | [Cp*RhCl <sub>2</sub> ] <sub>2</sub> (4) | AgSbF <sub>6</sub> (16) | Ag <sub>2</sub> CO <sub>3</sub>        | LiOAc                           |                  | DCE                | 27                     |
| 4               | [Cp*RhCl <sub>2</sub> ] <sub>2</sub> (4) | AgSbF <sub>6</sub> (16) | AgTFA                                  | LiOAc                           |                  | DCE                | trace                  |
| 5               | [Cp*RhCl <sub>2</sub> ] <sub>2</sub> (4) | AgSbF <sub>6</sub> (16) | Cu(OAc) <sub>2</sub>                   | LiOAc                           |                  | DCE                | trace                  |
| 6               | [Cp*RhCl <sub>2</sub> ] <sub>2</sub> (4) | AgSbF <sub>6</sub> (16) | Cu(OAc) <sub>2</sub> ·H <sub>2</sub> O | LiOAc                           |                  | DCE                | trace                  |
| 7               | [Cp*RhCl <sub>2</sub> ] <sub>2</sub> (4) | AgSbF <sub>6</sub> (16) | AgOAc                                  | LiOAc                           |                  | 1,4-dioxane        | 10                     |
| 8               | [Cp*RhCl <sub>2</sub> ] <sub>2</sub> (4) | AgSbF <sub>6</sub> (16) | AgOAc                                  | LiOAc                           |                  | THF                | 12                     |
| 9               | [Cp*RhCl <sub>2</sub> ] <sub>2</sub> (4) | AgSbF <sub>6</sub> (16) | AgOAc                                  | LiOAc                           |                  | CH <sub>3</sub> CN | 8                      |
| 10              | [Cp*RhCl <sub>2</sub> ] <sub>2</sub> (4) | AgSbF <sub>6</sub> (16) | AgOAc                                  | LiOAc                           |                  | toluene            | 10                     |
| 11              | [Cp*RhCl <sub>2</sub> ] <sub>2</sub> (4) | AgSbF <sub>6</sub> (16) | AgOAc                                  | LiOAc                           |                  | MeOH               | trace                  |
| 12              | [Cp*RhCl <sub>2</sub> ] <sub>2</sub> (4) | AgSbF <sub>6</sub> (16) | AgOAc                                  | LiOAc                           |                  | EtOAc              | 28                     |
| 13              | [Cp*RhCl <sub>2</sub> ] <sub>2</sub> (4) | AgSbF <sub>6</sub> (16) | AgOAc                                  | LiOAc                           |                  | CHCl <sub>3</sub>  | 24                     |
| 14              | [Cp*RhCl <sub>2</sub> ] <sub>2</sub> (4) | AgSbF <sub>6</sub> (16) | AgOAc                                  | LiOAc                           |                  | DCM                | 40                     |
| 15              | [Cp*RhCl <sub>2</sub> ] <sub>2</sub> (4) | AgSbF <sub>6</sub> (16) | AgOAc                                  |                                 |                  | DCM                | 38                     |
| 16              | [Cp*RhCl <sub>2</sub> ] <sub>2</sub> (4) | AgSbF <sub>6</sub> (16) | AgOAc                                  | Li <sub>2</sub> CO <sub>3</sub> |                  | DCM                | 47                     |
| 17              | [Cp*RhCl <sub>2</sub> ] <sub>2</sub> (4) | AgSbF <sub>6</sub> (16) | AgOAc                                  | Na <sub>2</sub> CO <sub>3</sub> |                  | DCM                | trace                  |
| 18              | [Cp*RhCl <sub>2</sub> ] <sub>2</sub> (4) | AgSbF <sub>6</sub> (16) | AgOAc                                  | NaOPiv                          |                  | DCM                | trace                  |
| 19              | [Cp*RhCl <sub>2</sub> ] <sub>2</sub> (4) | AgSbF <sub>6</sub> (16) | AgOAc                                  | K <sub>2</sub> HPO <sub>4</sub> |                  | DCM                | trace                  |
| 20              | [Cp*RhCl <sub>2</sub> ] <sub>2</sub> (4) | AgSbF <sub>6</sub> (16) | AgOAc                                  | CsOAc                           |                  | DCM                | trace                  |
| 21              | [Cp*RhCl <sub>2</sub> ] <sub>2</sub> (4) | AgBF <sub>4</sub> (16)  | AgOAc                                  | Li <sub>2</sub> CO <sub>3</sub> |                  | DCM                | 20                     |
| 22              | [Cp*RhCl <sub>2</sub> ] <sub>2</sub> (4) | AgPF <sub>6</sub> (16)  | AgOAc                                  | Li <sub>2</sub> CO <sub>3</sub> |                  | DCM                | 16                     |
| 23 <sup>c</sup> | [Cp*RhCl <sub>2</sub> ] <sub>2</sub> (4) | AgSbF <sub>6</sub> (16) | AgOAc                                  | Li <sub>2</sub> CO <sub>3</sub> |                  | DCM                | 38                     |
| 24 <sup>d</sup> | [Cp*RhCl <sub>2</sub> ] <sub>2</sub> (4) | AgSbF <sub>6</sub> (16) | AgOAc                                  | Li <sub>2</sub> CO <sub>3</sub> |                  | DCM                | 49                     |

|                   |                                                                 |                         |       |                                 |                         |     |      |
|-------------------|-----------------------------------------------------------------|-------------------------|-------|---------------------------------|-------------------------|-----|------|
| 25 <sup>e</sup>   | [Cp*RhCl <sub>2</sub> ] <sub>2</sub> (4)                        | AgSbF <sub>6</sub> (16) | AgOAc | Li <sub>2</sub> CO <sub>3</sub> |                         | DCM | 48   |
| 26 <sup>f</sup>   | [Cp*RhCl <sub>2</sub> ] <sub>2</sub> (4)                        | AgSbF <sub>6</sub> (16) | AgOAc | Li <sub>2</sub> CO <sub>3</sub> |                         | DCM | 35   |
| 27 <sup>e,g</sup> | [Cp*RhCl <sub>2</sub> ] <sub>2</sub> (4)                        | AgSbF <sub>6</sub> (16) | AgOAc | Li <sub>2</sub> CO <sub>3</sub> |                         | DCM | 40   |
| 28 <sup>e,h</sup> | [Cp*RhCl <sub>2</sub> ] <sub>2</sub> (4)                        | AgSbF <sub>6</sub> (16) | AgOAc | Li <sub>2</sub> CO <sub>3</sub> |                         | DCM | 45   |
| 29 <sup>e</sup>   | [Cp*RhCl <sub>2</sub> ] <sub>2</sub> (2)                        | AgSbF <sub>6</sub> (8)  | AgOAc | Li <sub>2</sub> CO <sub>3</sub> |                         | DCM | 41   |
| 30 <sup>e</sup>   | [Cp*RhCl <sub>2</sub> ] <sub>2</sub> (3)                        | AgSbF <sub>6</sub> (12) | AgOAc | Li <sub>2</sub> CO <sub>3</sub> |                         | DCM | 64   |
| 31 <sup>e</sup>   | [Cp*RhCl <sub>2</sub> ] <sub>2</sub> (5)                        | AgSbF <sub>6</sub> (20) | AgOAc | Li <sub>2</sub> CO <sub>3</sub> |                         | DCM | 46   |
| 33 <sup>e</sup>   | [Cp*RhCl <sub>2</sub> ] <sub>2</sub> (3)                        | AgSbF <sub>6</sub> (12) | AgOAc | Li <sub>2</sub> CO <sub>3</sub> | Zn(OAc) <sub>2</sub>    | DCM | 49   |
| 34 <sup>e</sup>   | [Cp*RhCl <sub>2</sub> ] <sub>2</sub> (3)                        | AgSbF <sub>6</sub> (12) | AgOAc | Li <sub>2</sub> CO <sub>3</sub> | Zn(OTf) <sub>2</sub>    | DCM | 38   |
| 35 <sup>e</sup>   | [Cp*RhCl <sub>2</sub> ] <sub>2</sub> (3)                        | AgSbF <sub>6</sub> (12) | AgOAc | Li <sub>2</sub> CO <sub>3</sub> | Mg(OTf) <sub>2</sub>    | DCM | 49   |
| 36 <sup>e</sup>   | [Cp*RhCl <sub>2</sub> ] <sub>2</sub> (3)                        | AgSbF <sub>6</sub> (12) | AgOAc | Li <sub>2</sub> CO <sub>3</sub> | Ni(hfacac) <sub>2</sub> | DCM | 62   |
| 37 <sup>e</sup>   | [Cp*RhCl <sub>2</sub> ] <sub>2</sub> (3)                        | AgSbF <sub>6</sub> (12) | AgOAc | Li <sub>2</sub> CO <sub>3</sub> | Cu(hfacac) <sub>2</sub> | DCM | 68   |
| 38 <sup>e</sup>   | [Cp*RhCl <sub>2</sub> ] <sub>2</sub> (3)                        | AgSbF <sub>6</sub> (12) | AgOAc | Li <sub>2</sub> CO <sub>3</sub> | Ni(OTf) <sub>2</sub>    | DCM | 42   |
| 39 <sup>e</sup>   | [Cp*RhCl <sub>2</sub> ] <sub>2</sub> (3)                        | AgSbF <sub>6</sub> (12) | AgOAc | Li <sub>2</sub> CO <sub>3</sub> | B(OH) <sub>3</sub>      | DCM | 60   |
| 40 <sup>e</sup>   | [Cp*RhCl <sub>2</sub> ] <sub>2</sub> (3)                        | AgSbF <sub>6</sub> (12) | AgOAc | Li <sub>2</sub> CO <sub>3</sub> | Trimesic acid           | DCM | 57   |
| 41 <sup>e</sup>   | [Cp*Rh(MeCN) <sub>3</sub> ](SbF <sub>6</sub> ) <sub>2</sub> (6) |                         | AgOAc | Li <sub>2</sub> CO <sub>3</sub> | Cu(hfacac) <sub>2</sub> | DCM | 70   |
| 42 <sup>e,i</sup> | [Cp*Rh(MeCN) <sub>3</sub> ](SbF <sub>6</sub> ) <sub>2</sub> (6) |                         | AgOAc | Li <sub>2</sub> CO <sub>3</sub> | Cu(hfacac) <sub>2</sub> | DCM | 74   |
| 43 <sup>e,j</sup> | [Cp*Rh(MeCN) <sub>3</sub> ](SbF <sub>6</sub> ) <sub>2</sub> (6) |                         | AgOAc | Li <sub>2</sub> CO <sub>3</sub> | Cu(hfacac) <sub>2</sub> | DCM | 75   |
| 44 <sup>e,j</sup> | [Cp*Rh(MeCN) <sub>3</sub> ](SbF <sub>6</sub> ) <sub>2</sub> (6) |                         | AgOAc | Li <sub>2</sub> CO <sub>3</sub> |                         | DCM | 66   |
| 45 <sup>e,i</sup> | Cp*Co(CO) <sub>2</sub> (6)                                      | AgSbF <sub>6</sub> (12) | AgOAc | Li <sub>2</sub> CO <sub>3</sub> | Cu(hfacac) <sub>2</sub> | DCM | n.d. |
| 46 <sup>e,i</sup> | RhCl <sub>3</sub> (6)                                           | AgSbF <sub>6</sub> (12) | AgOAc | Li <sub>2</sub> CO <sub>3</sub> | Cu(hfacac) <sub>2</sub> | DCM | n.d. |
| 47 <sup>e,i</sup> |                                                                 |                         | AgOAc | Li <sub>2</sub> CO <sub>3</sub> | Cu(hfacac) <sub>2</sub> | DCM | n.d. |
| 48 <sup>e,i</sup> | Cp*Rh(MeCN) <sub>3</sub> ](SbF <sub>6</sub> ) <sub>2</sub> (6)  |                         |       | Li <sub>2</sub> CO <sub>3</sub> | Cu(hfacac) <sub>2</sub> | DCM | n.d. |

<sup>a</sup>Reaction conditions: **1a** (0.2 mmol), **2a** (0.4 mmol), [Cp\*RhCl<sub>2</sub>]<sub>2</sub> (4 mol%), AgSbF<sub>6</sub> (16 mol%), oxidant (2 equiv), base (2 equiv), and additive (10 mol%) in solvent (2 mL) at 80 °C for 24 h under a nitrogen atmosphere. <sup>b</sup>Yields of isolated products. <sup>c</sup>**2a** (0.6 mmol). <sup>d</sup>Li<sub>2</sub>CO<sub>3</sub> (3 equiv). <sup>e</sup>Li<sub>2</sub>CO<sub>3</sub> (1 equiv). <sup>f</sup>Li<sub>2</sub>CO<sub>3</sub> (0.5 equiv). <sup>g</sup>AgOAc (1 equiv). <sup>h</sup>AgOAc (1.5 equiv). <sup>i</sup>100 °C. <sup>j</sup>120 °C.

## 2.2 General procedure for the synthesis of indanones **3** and **4**

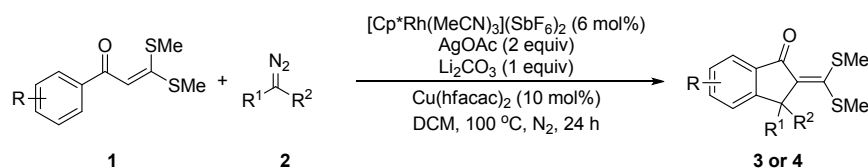

**A typical procedure for the synthesis of 3a:** A mixture of **1a** (44.9 mg, 0.2 mmol), diazo compound **2a** (62.5 mg, 0.4 mmol), [Cp\*Rh(MeCN)<sub>3</sub>](SbF<sub>6</sub>)<sub>2</sub> (10.0 mg, 0.012 mmol), AgOAc (66.8 mg, 0.4 mmol), Li<sub>2</sub>CO<sub>3</sub> (14.8 mg, 0.2 mmol), and Cu(hfacac)<sub>2</sub> (9.6 mg, 0.02 mmol) in 2 mL DCM was vigorously stirred at 100 °C for 24 h under a nitrogen atmosphere. After cooling to ambient temperature, all the

volatiles were evaporated under reduced pressure. The resultant residue was purified by column chromatography on silica gel (eluent: petroleum ether (60–90 °C)/ethyl acetate = 20:1, v/v) to afford product **3a** (52.2 mg, 74%).

*A typical procedure for the synthesis of 3g on 1 mmol scale:* A mixture of **1g** (238.4 mg, 1 mmol), diazo compound **2a** (312.3 mg, 2 mmol), [Cp\*Rh(MeCN)<sub>3</sub>](SbF<sub>6</sub>)<sub>2</sub> (50.9 mg, 0.06 mmol), AgOAc (333.8 mg, 2 mmol), Li<sub>2</sub>CO<sub>3</sub> (74.0 mg, 1 mmol), and Cu(hfacac)<sub>2</sub> (47.8 mg, 0.1 mmol) in 10 mL DCM was vigorously stirred at 100 °C for 24 h under a nitrogen atmosphere. After cooling to ambient temperature, all the volatiles were evaporated under reduced pressure. The resultant residue was purified by column chromatography on silica gel (eluent: petroleum ether (60–90 °C)/ethyl acetate = 20:1, v/v) to afford product **3g** (255.5 mg, 70%).

*A typical procedure for the synthesis of 3p':* A mixture of **1p** (35.0 mg, 0.2 mmol), diazo compound **2a** (93.7 mg, 0.6 mmol), [Cp\*Rh(MeCN)<sub>3</sub>](SbF<sub>6</sub>)<sub>2</sub> (10.0 mg, 0.012 mmol), AgOAc (66.8 mg, 0.4 mmol), Li<sub>2</sub>CO<sub>3</sub> (14.8 mg, 0.2 mmol), and Cu(hfacac)<sub>2</sub> (9.6 mg, 0.02 mmol) in 2 mL DCM was vigorously stirred at 100 °C for 24 h under a nitrogen atmosphere. After cooling to ambient temperature, all the volatiles were evaporated under reduced pressure. The resultant residue was purified by column chromatography on silica gel (eluent: petroleum ether (60–90 °C)/ethyl acetate = 20:1, v/v) to afford product **3p'** (32.6 mg, 44%).

## 2.3 Mechanistic studies

### (a) H/D Exchange experiment

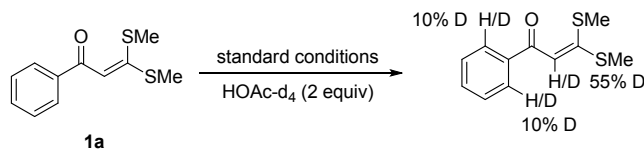

A mixture of **1a** (44.9 mg, 0.2 mmol), [Cp\*Rh(MeCN)<sub>3</sub>](SbF<sub>6</sub>)<sub>2</sub> (10.0 mg, 0.012 mmol), AgOAc (66.8 mg, 0.4 mmol), Li<sub>2</sub>CO<sub>3</sub> (14.8 mg, 0.2 mmol), Cu(hfacac)<sub>2</sub> (9.6 mg, 0.02 mmol), and HOAc-d<sub>4</sub> (25.6 mg, 0.4 mmol) in 2 mL DCM was vigorously stirred at 100 °C for 24 h under a nitrogen atmosphere. After cooling to ambient

temperature, all the volatiles were evaporated under reduced pressure. The resultant residue was purified by column chromatography on silica gel (eluent: petroleum ether (60–90 °C)/ethyl acetate = 20:1, v/v) to afford product **3a**, which was characterized by <sup>1</sup>H NMR spectroscopy

H-D

d4 AcOH H/D <sup>1</sup>H NMR in CDCl<sub>3</sub>

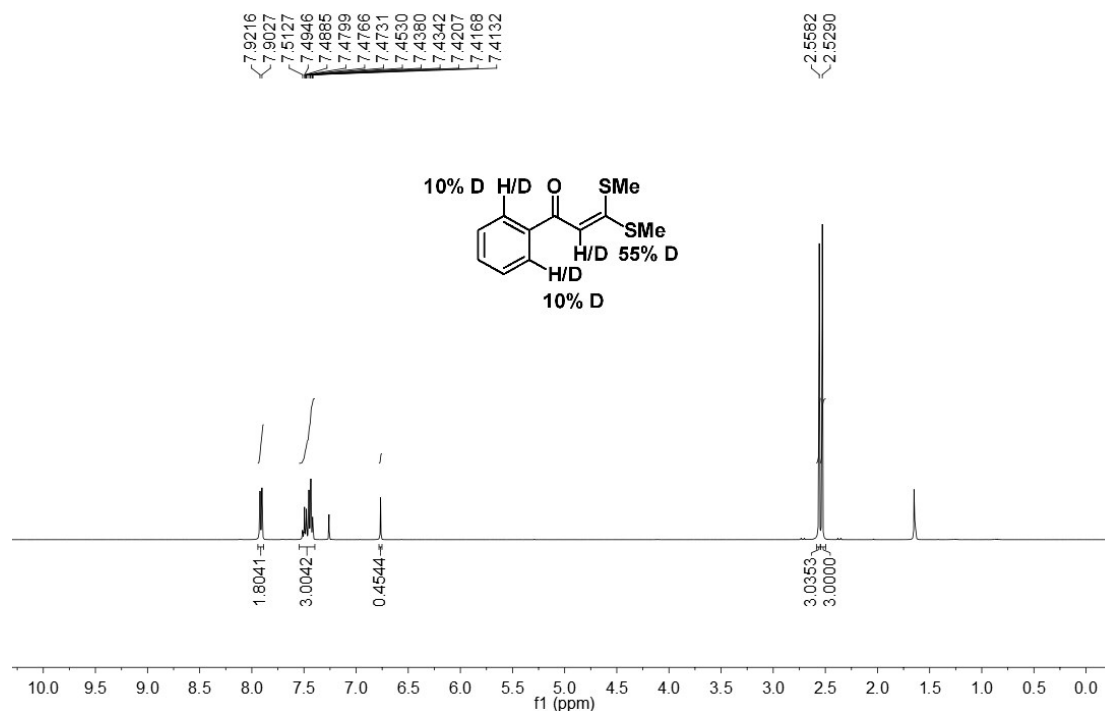

### (b) Kinetic isotope effect (KIE) experiments

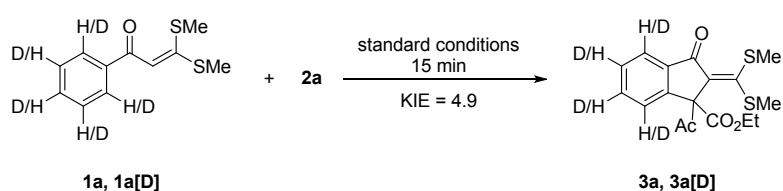

The reactions of benzoyl ketene dithioacetal **1a** and its deuterated form **1a[D]**, were carried out in a parallel manner under the optimized conditions. A mixture of **1a** or **1a[D]** (44.9 mg, 0.2 mmol), diazo compound **2a** (62.5 mg, 0.4 mmol), [Cp\**Rh*(MeCN)<sub>3</sub>](SbF<sub>6</sub>)<sub>2</sub> (10.0 mg, 0.012 mmol), AgOAc (66.8 mg, 0.4 mmol), Li<sub>2</sub>CO<sub>3</sub> (14.8 mg, 0.2 mmol), and Cu(hfacac)<sub>2</sub> (9.6 mg, 0.02 mmol) in 2 mL DCM was vigorously stirred at 100 °C for 15 min under a nitrogen atmosphere. After cooling to ambient temperature, the two reaction solutions were mixed together and

all the volatiles were evaporated under reduced pressure. The resultant residue was purified by column chromatography on silica gel (eluent: petroleum ether (60–90 °C)/ethyl acetate = 20:1, v/v) to afford the mixture of **3a** and **3a**[D]. The KIE value was determined to be  $k_H/k_D = 4.9$  on the basis of  $^1\text{H}$  NMR analysis.

LJ-I094-KIE  
I094  $^1\text{H}$  NMR in  $\text{CDCl}_3$

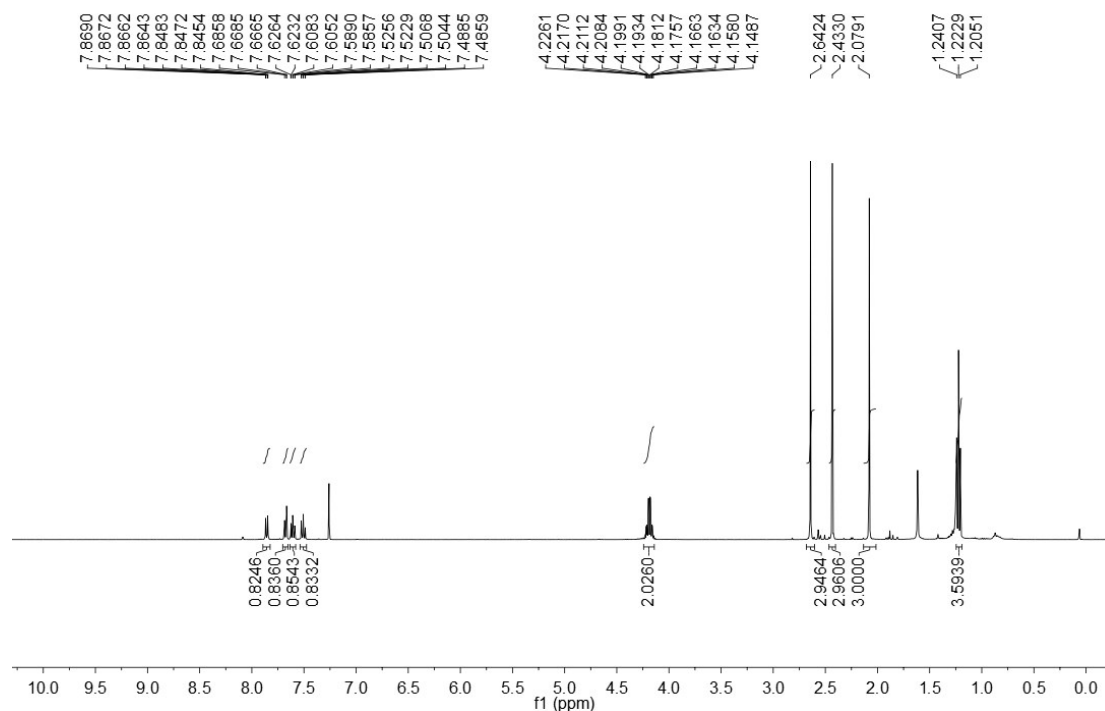

### (c) Intermolecular competition reaction

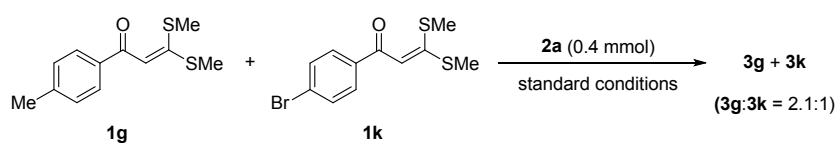

A mixture of **1g** (47.7 mg, 0.2 mmol), **1k** (60.6 mg, 0.2 mmol), diazo compound **2a** (62.5 mg, 0.4 mmol),  $[\text{Cp}^*\text{Rh}(\text{MeCN})_3](\text{SbF}_6)_2$  (10.0 mg, 0.012 mmol),  $\text{AgOAc}$  (66.8 mg, 0.4 mmol),  $\text{Li}_2\text{CO}_3$  (14.8 mg, 0.2 mmol), and  $\text{Cu}(\text{hfacac})_2$  (9.6 mg, 0.02 mmol) in 2 mL DCM was vigorously stirred at 100 °C for 24 h under a nitrogen atmosphere. After cooling to ambient temperature, all the volatiles were evaporated under reduced pressure. The resultant residue was purified by column chromatography on silica gel (eluent: petroleum ether (60–90 °C)/ethyl acetate = 20:1, v/v) to afford the mixture of **3g** and **3k**. The ratio of **3g** and **3k** was determined

to be **3g:3k** = 1:0.48 on the basis of  $^1\text{H}$  NMR analysis.

Desktop  
I092  $^1\text{H}$  NMR in  $\text{CDCl}_3$

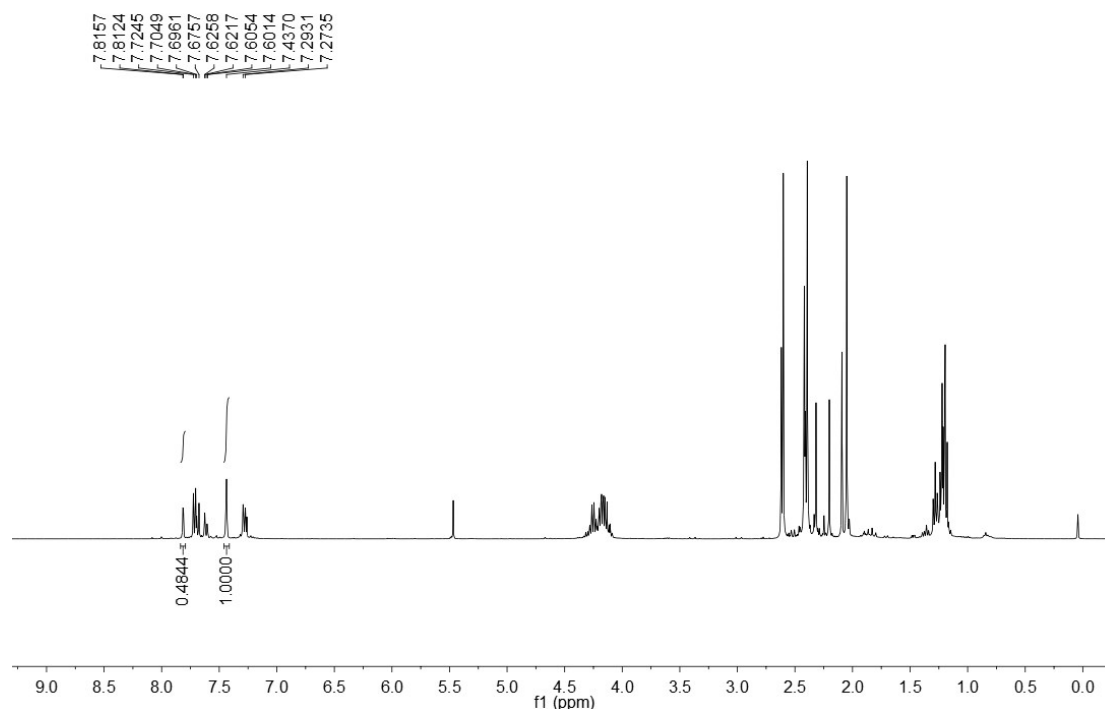

### 3. X-Ray crystallographic studies

The X-ray diffraction analysis for compound **3h** and **3p'** were carried out on a SMART APEX diffractometer with graphite-monochromated Mo radiation ( $\lambda = 0.71073 \text{ \AA}$ ). Cell parameters were obtained by global refinement of the positions of all collected reflections. Intensities were corrected for Lorentz and polarization effects and empirical absorption. The structures were solved by direct methods and refined by full-matrix least squares on  $F^2$ . All non-hydrogen atoms were refined anisotropically. All hydrogen atoms were placed in calculated positions. Structure solution and refinement were performed by using the SHELXL-97 package. The X-ray crystallographic files, in CIF format, are available from the Cambridge Crystallographic Data Centre on quoting the deposition numbers CCDC 2052734 for compound **3h** and 2052735 for **3p'**. Copies of this information may be obtained free of charge from The Director, CCDC, 12 Union Road, Cambridge CB2 IEZ, UK (Fax: +44-1223-336033; e-mail: [deposit@ccdc.cam.ac.uk](mailto:deposit@ccdc.cam.ac.uk) or www: <http://www.ccdc.cam.ac.uk>).



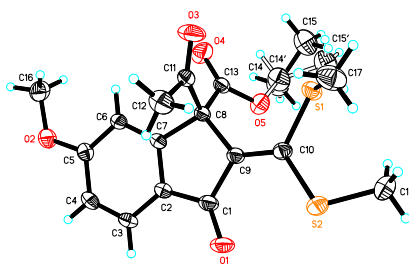

**Figure S1.** Molecular structure of compound **3h**.

**Table S2. Crystal Data and Structure Refinement for Compound 3h**

|                                        |                                                                    |                              |
|----------------------------------------|--------------------------------------------------------------------|------------------------------|
| Identification code                    | LZQ-94                                                             |                              |
| Empirical formula                      | $C_{18}H_{20}O_5S_2$                                               |                              |
| Formula weight                         | 380.46                                                             |                              |
| Temperature                            | 293(2) K                                                           |                              |
| Wavelength                             | 0.71073 Å                                                          |                              |
| Crystal system                         | Triclinic                                                          |                              |
| Space group                            | P -1                                                               |                              |
| Unit cell dimensions                   | $a = 8.6038(8)$ Å                                                  | $\alpha = 94.108(9)^\circ$ . |
|                                        | $b = 9.8764(10)$ Å                                                 | $\beta = 103.211(8)^\circ$ . |
|                                        | $c = 11.2269(12)$ Å                                                | $\gamma = 95.986(8)^\circ$ . |
| Volume                                 | $919.19(16)$ Å <sup>3</sup>                                        |                              |
| Z                                      | 2                                                                  |                              |
| Density (calculated)                   | $1.375$ Mg/m <sup>3</sup>                                          |                              |
| Absorption coefficient                 | $0.315$ mm <sup>-1</sup>                                           |                              |
| F(000)                                 | 400                                                                |                              |
| Crystal size                           | $0.170 \times 0.150 \times 0.120$ mm <sup>3</sup>                  |                              |
| Theta range for data collection        | $3.013$ to $25.998^\circ$ .                                        |                              |
| Index ranges                           | $-10 \leq h \leq 10$ , $-11 \leq k \leq 12$ , $-13 \leq l \leq 13$ |                              |
| Reflections collected                  | 7376                                                               |                              |
| Independent reflections                | 3608 [R(int) = 0.0253]                                             |                              |
| Completeness to theta = $25.242^\circ$ | 99.8 %                                                             |                              |
| Absorption correction                  | Semi-empirical from equivalents                                    |                              |
| Max. and min. transmission             | 1.0000 and 0.8179                                                  |                              |
| Refinement method                      | Full-matrix least-squares on F <sup>2</sup>                        |                              |
| Data / restraints / parameters         | 3608 / 38 / 250                                                    |                              |
| Goodness-of-fit on F <sup>2</sup>      | 1.016                                                              |                              |
| Final R indices [I > 2sigma(I)]        | R1 = 0.0492, wR2 = 0.1162                                          |                              |
| R indices (all data)                   | R1 = 0.0756, wR2 = 0.1372                                          |                              |
| Extinction coefficient                 | n/a                                                                |                              |
| Largest diff. peak and hole            | 0.394 and -0.321 e.Å <sup>-3</sup>                                 |                              |

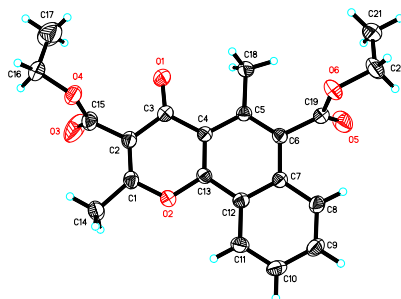

**Figure S2.** Molecular structure of compound **3p'**.

**Table S3. Crystal Data and Structure Refinement for Compound 3p'**

|                                   |                                             |                              |
|-----------------------------------|---------------------------------------------|------------------------------|
| Identification code               | 2020611-1                                   |                              |
| Empirical formula                 | $C_{21}H_{20}O_6$                           |                              |
| Formula weight                    | 368.37                                      |                              |
| Temperature                       | 293(2) K                                    |                              |
| Wavelength                        | 0.71073 Å                                   |                              |
| Crystal system                    | Triclinic                                   |                              |
| Space group                       | P -1                                        |                              |
| Unit cell dimensions              | $a = 7.3893(7)$ Å                           | $\alpha = 90.188(9)^\circ$ . |
|                                   | $b = 10.2769(14)$ Å                         | $\beta = 101.277(8)^\circ$ . |
|                                   | $c = 12.0917(11)$ Å                         | $\gamma = 91.828(9)^\circ$ . |
| Volume                            | $900.01(17)$ Å <sup>3</sup>                 |                              |
| Z                                 | 2                                           |                              |
| Density (calculated)              | 1.359 Mg/m <sup>3</sup>                     |                              |
| Absorption coefficient            | 0.100 mm <sup>-1</sup>                      |                              |
| F(000)                            | 388                                         |                              |
| Crystal size                      | 0.200 x 0.160 x 0.130 mm <sup>3</sup>       |                              |
| Theta range for data collection   | 2.995 to 25.498°.                           |                              |
| Index ranges                      | -8 ≤ h ≤ 8, -12 ≤ k ≤ 12, -14 ≤ l ≤ 14      |                              |
| Reflections collected             | 5899                                        |                              |
| Independent reflections           | 3337 [R(int) = 0.0191]                      |                              |
| Completeness to theta = 25.242°   | 99.8 %                                      |                              |
| Absorption correction             | Semi-empirical from equivalents             |                              |
| Max. and min. transmission        | 1.000 and 0.815                             |                              |
| Refinement method                 | Full-matrix least-squares on F <sup>2</sup> |                              |
| Data / restraints / parameters    | 3337 / 0 / 249                              |                              |
| Goodness-of-fit on F <sup>2</sup> | 1.026                                       |                              |
| Final R indices [I > 2σ(I)]       | R1 = 0.0496, wR2 = 0.1235                   |                              |
| R indices (all data)              | R1 = 0.0772, wR2 = 0.1481                   |                              |
| Extinction coefficient            | 0.040(5)                                    |                              |
| Largest diff. peak and hole       | 0.186 and -0.166 e.Å <sup>-3</sup>          |                              |

#### 4. Analytical data

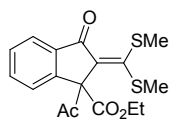

##### **Ethyl 1-acetyl-2-(bis(methylthio)methylene)-3-oxo-2,3-dihydro-1H-indene-1-carboxylate**

**(3a)**: Following the general procedure, pure **3a** was obtained by column chromatography on silica gel (eluent: petroleum ether (60–90 °C)/EtOAc = 20:1, v/v). 52.2 mg, 74% yield, yellow oil. <sup>1</sup>H NMR (400 MHz, CDCl<sub>3</sub>) δ 7.84 (d, *J* = 7.6 Hz, 1H), 7.66 (d, *J* = 7.7 Hz, 1H), 7.60 (td, *J* = 7.5 and 1.3 Hz, 1H), 7.49 (td, *J* = 7.5 and 1.0 Hz, 1H), 4.22–4.13 (m, 2H), 2.63 (s, 3H), 2.42 (s, 3H), 2.07 (s, 3H), 1.21 (t, *J* = 7.1 Hz, 3H). <sup>13</sup>C{<sup>1</sup>H} NMR (100 MHz, CDCl<sub>3</sub>) δ 200.2, 188.4, 167.8, 160.4, 144.9, 139.0, 135.3, 134.4, 129.9, 125.7, 124.6, 72.5, 62.3, 26.7, 18.8, 18.3, 14.0. HRMS Calcd for C<sub>17</sub>H<sub>18</sub>O<sub>4</sub>S<sub>2</sub> [M+H]<sup>+</sup>: 351.0719; Found: 351.0720.

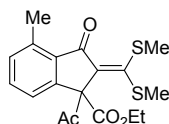

##### **Ethyl 1-acetyl-2-(bis(methylthio)methylene)-4-methyl-3-oxo-2,3-dihydro-1H-indene-1-carboxylate**

**(3b)**: Following the general procedure, pure **3b** was obtained by column chromatography on silica gel (eluent: petroleum ether (60–90 °C)/EtOAc = 20:1, v/v). 33.0 mg, 45% yield, yellow oil. <sup>1</sup>H NMR (400 MHz, CDCl<sub>3</sub>) δ 7.47 (m, 2H), 7.24 (m, 1H), 4.24–4.12 (m, 2H), 2.72 (s, 3H), 2.63 (s, 3H), 2.40 (s, 3H), 2.10 (s, 3H), 1.22 (t, *J* = 7.1 Hz, 3H). <sup>13</sup>C{<sup>1</sup>H} NMR (100 MHz, CDCl<sub>3</sub>) δ 200.3, 190.0, 168.1, 158.5, 145.6, 139.8, 136.4, 136.1, 133.8, 132.0, 123.1, 71.9, 62.3, 26.8, 18.8, 18.4, 17.9, 14.1. HRMS Calcd for C<sub>18</sub>H<sub>20</sub>O<sub>4</sub>S<sub>2</sub> [M+H]<sup>+</sup>: 365.0876; Found: 365.0869.

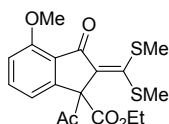

##### **Ethyl 1-acetyl-2-(bis(methylthio)methylene)-4-methoxy-3-oxo-2,3-dihydro-1H-indene-1-carboxylate**

**(3c)**: Following the general procedure, pure **3c** was obtained by column chromatography on silica gel (eluent: petroleum ether (60–90 °C)/EtOAc = 20:1, v/v). 42.8 mg, 56% yield, yellow solid, m.p.: 114–115 °C. <sup>1</sup>H NMR (400 MHz, CDCl<sub>3</sub>) δ 7.55–7.49 (m, 1H), 7.22–7.17 (m, 1H), 6.93 (d, *J* = 8.3 Hz, 1H), 4.20–4.10 (m, 2H), 3.96 (s, 3H), 2.59 (s, 3H), 2.39 (s,

3H), 2.05 (s, 3H), 1.19 (t,  $J = 7.1$  Hz, 3H).  $^{13}\text{C}\{^1\text{H}\}$  NMR (100 MHz,  $\text{CDCl}_3$ )  $\delta$  199.9, 186.7, 167.8, 158.6, 158.1, 146.9, 135.9, 135.5, 126.9, 117.4, 111.8, 71.7, 62.2, 56.1, 26.6, 18.7, 18.1, 14.0. HRMS Calcd for  $\text{C}_{18}\text{H}_{20}\text{O}_5\text{S}_2$   $[\text{M}+\text{H}]^+$ : 381.0825; Found: 381.0831.

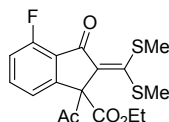

**Ethyl 1-acetyl-2-(bis(methylthio)methylene)-4-fluoro-3-oxo-2,3-dihydro-1H-indene-1-carboxylate (3d):** Following the general procedure, pure **3d** was obtained by column chromatography on silica gel (eluent: petroleum ether (60–90 °C)/EtOAc = 20:1, v/v). 40.2 mg, 54% yield, yellow oil.  $^1\text{H}$  NMR (400 MHz,  $\text{CDCl}_3$ )  $\delta$  7.57 (m, 1H), 7.45 (m, 1H), 7.13 (t,  $J = 8.6$  Hz, 1H), 4.19 (m, 2H), 2.64 (s, 3H), 2.43 (s, 3H), 2.12 (s, 3H), 1.22 (t,  $J = 7.1$  Hz, 3H).  $^{13}\text{C}\{^1\text{H}\}$  NMR (100 MHz,  $\text{CDCl}_3$ )  $\delta$  199.6, 185.0, 167.5, 161.3, 159.4 (d,  $J = 263.0$  Hz), 146.5 (d,  $J = 2.8$  Hz), 135.9 (d,  $J = 8.2$  Hz), 134.5, 126.6 (d,  $J = 13.3$  Hz), 121.6 (d,  $J = 4.2$  Hz), 117.1 (d,  $J = 19.0$  Hz), 72.3, 62.5, 26.8, 18.9, 18.4, 14.0. HRMS Calcd for  $\text{C}_{17}\text{H}_{17}\text{O}_4\text{FS}_2$   $[\text{M}+\text{H}]^+$ : 369.0625; Found: 369.0628.

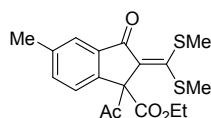

**Ethyl 1-acetyl-2-(bis(methylthio)methylene)-5-methyl-3-oxo-2,3-dihydro-1H-indene-1-carboxylate (3e):** Following the general procedure, pure **3e** was obtained by column chromatography on silica gel (eluent: petroleum ether (60–90 °C)/EtOAc = 20:1, v/v). 55.0 mg, 75% yield, yellow solid, m.p.: 67–68 °C.  $^1\text{H}$  NMR (400 MHz,  $\text{CDCl}_3$ )  $\delta$  7.63 (s, 1H), 7.53 (d,  $J = 7.9$  Hz, 1H), 7.40 (dd,  $J = 7.9, 0.9$  Hz, 1H), 4.21 – 4.11 (m, 2H), 2.62 (s, 3H), 2.41 (d, 6H), 2.05 (s, 3H), 1.20 (t,  $J = 7.1$  Hz, 3H).  $^{13}\text{C}\{^1\text{H}\}$  NMR (100 MHz,  $\text{CDCl}_3$ )  $\delta$  200.3, 188.5, 168.0, 159.8, 142.3, 140.3, 139.2, 135.7, 135.6, 125.4, 124.6, 72.2, 62.2, 26.5, 21.4, 18.7, 18.2, 14.0. HRMS Calcd for  $\text{C}_{18}\text{H}_{20}\text{O}_4\text{S}_2$   $[\text{M}+\text{H}]^+$ : 365.0876; Found: 365.0870.

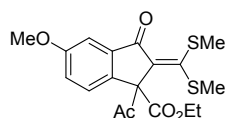

**Ethyl 1-acetyl-2-(bis(methylthio)methylene)-5-methoxy-3-oxo-2,3-dihydro-1H-indene-1-carboxylate (3f):** Following the general procedure, pure **3f** was obtained by column chromatography on silica gel (eluent: petroleum ether (60–90 °C)/EtOAc = 20:1, v/v). 32.2 mg,

42% yield, yellow solid, m.p.: 131-132 °C. <sup>1</sup>H NMR (400 MHz, CDCl<sub>3</sub>) δ 7.55 (d, *J* = 8.5 Hz, 1H), 7.28 (d, *J* = 2.6 Hz, 1H), 7.16 (dd, *J* = 8.5, 2.6 Hz, 1H), 4.23 – 4.13 (m, 2H), 3.86 (s, 3H), 2.63 (s, 3H), 2.42 (s, 3H), 2.05 (s, 3H), 1.22 (t, *J* = 7.1 Hz, 3H). <sup>13</sup>C{<sup>1</sup>H} NMR (100 MHz, CDCl<sub>3</sub>) δ 200.5, 188.3, 168.1, 161.3, 160.3, 140.6, 137.5, 135.7, 126.8, 123.2, 106.3, 71.9, 62.2, 55.9, 26.4, 18.8, 18.3, 14.1. HRMS Calcd for C<sub>18</sub>H<sub>20</sub>O<sub>5</sub>S<sub>2</sub> [M+H]<sup>+</sup>: 381.0825; Found: 381.0826.

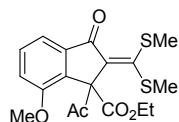

**Ethyl 1-acetyl-2-(bis(methylthio)methylene)-7-methoxy-3-oxo-2,3-dihydro-1H-indene-1-carboxylate (3f)**: Following the general procedure, pure **3f** was obtained by column chromatography on silica gel (eluent: petroleum ether (60–90 °C)/EtOAc = 20:1, v/v). 25.6 mg, 34% yield, yellow oil. <sup>1</sup>H NMR (400 MHz, CDCl<sub>3</sub>) δ 7.42 (d, *J* = 4.6 Hz, 2H), 7.05 (m, 1H), 4.19 – 4.06 (m, 2H), 3.86 (s, 3H), 2.57 (s, 3H), 2.47 (s, 3H), 2.36 (s, 3H), 1.14 (t, *J* = 7.1 Hz, 3H). <sup>13</sup>C{<sup>1</sup>H} NMR (100 MHz, CDCl<sub>3</sub>) δ 201.8, 188.5, 168.6, 157.9, 156.1, 140.8, 137.6, 134.8, 131.1, 116.4, 116.1, 70.1, 61.7, 55.8, 29.0, 18.7, 18.1, 14.0. HRMS Calcd for C<sub>18</sub>H<sub>20</sub>O<sub>5</sub>S<sub>2</sub> [M+H]<sup>+</sup>: 381.0825; Found: 381.0830.

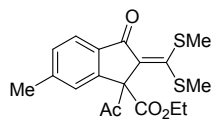

**Ethyl 1-acetyl-2-(bis(methylthio)methylene)-6-methyl-3-oxo-2,3-dihydro-1H-indene-1-carboxylate (3g)**: Following the general procedure, pure **3g** was obtained by column chromatography on silica gel (eluent: petroleum ether (60–90 °C)/EtOAc = 20:1, v/v). 57.1 mg, 78% yield, yellow solid, m.p.: 98-99 °C. <sup>1</sup>H NMR (400 MHz, CDCl<sub>3</sub>) δ 7.73 (d, *J* = 7.8 Hz, 1H), 7.45 (d, *J* = 0.5 Hz, 1H), 7.29 (dd, *J* = 7.8, 0.7 Hz, 1H), 4.25 – 4.08 (m, 2H), 2.61 (s, 3H), 2.43 (s, 3H), 2.41 (s, 3H), 2.06 (s, 3H), 1.21 (t, *J* = 7.1 Hz, 3H). <sup>13</sup>C{<sup>1</sup>H} NMR (100 MHz, CDCl<sub>3</sub>) δ 200.2, 188.2, 167.9, 159.1, 145.9, 145.3, 136.9, 135.9, 131.0, 125.9, 124.5, 72.2, 62.2, 26.9, 22.3, 18.7, 18.2, 14.0. HRMS Calcd for C<sub>18</sub>H<sub>20</sub>O<sub>4</sub>S<sub>2</sub> [M+H]<sup>+</sup>: 365.0876; Found: 365.0875.

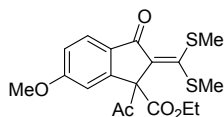

**Ethyl 1-acetyl-2-(bis(methylthio)methylene)-6-methoxy-3-oxo-2,3-dihydro-1H-indene-1-carboxylate (3h)**: Following the general procedure, pure **3h** was obtained by column chromatography on silica gel (eluent: petroleum ether (60–90 °C)/EtOAc = 20:1, v/v). 61.2 mg,

80% yield, yellow solid, m.p.: 129-130 °C. <sup>1</sup>H NMR (400 MHz, CDCl<sub>3</sub>) δ 7.77 (d, *J* = 8.5 Hz, 1H), 7.08 (d, *J* = 2.2 Hz, 1H), 7.01 (dd, *J* = 8.5, 2.3 Hz, 1H), 4.18 (m, 2H), 3.87 (s, 3H), 2.61 (s, 3H), 2.40 (s, 3H), 2.04 (s, 3H), 1.22 (t, *J* = 7.1 Hz, 3H). <sup>13</sup>C{<sup>1</sup>H} NMR (100 MHz, CDCl<sub>3</sub>) δ 200.1, 187.3, 167.6, 165.0, 158.0, 147.5, 135.9, 132.5, 126.3, 117.7, 109.2, 72.2, 62.3, 56.0, 26.5, 18.6, 18.1, 14.1. HRMS Calcd for C<sub>18</sub>H<sub>20</sub>O<sub>5</sub>S<sub>2</sub> [M+H]<sup>+</sup>: 381.0825; Found: 381.0829.

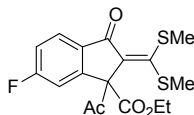

**Benzyl 5-(*tert*-butyl)-1-methyl-2-oxo-1a,2,7,7a-tetrahydro-1H-cyclopropa[*b*]naphthalene-1-carboxylate (3i):** Following the general procedure, pure **3i** was obtained by column chromatography on silica gel (eluent: petroleum ether (60–90 °C)/EtOAc = 20:1, v/v). 52.1 mg, 71% yield, yellow oil. <sup>1</sup>H NMR (400 MHz, CDCl<sub>3</sub>) δ 7.85 (dd, *J* = 8.4, 5.3 Hz, 1H), 7.34 (dd, *J* = 8.4, 2.2 Hz, 1H), 7.19 (td, *J* = 8.6, 2.3 Hz, 1H), 4.20 (m, 2H), 2.63 (s, 3H), 2.42 (s, 3H), 2.09 (s, 3H), 1.24 (t, *J* = 7.1 Hz, 3H). <sup>13</sup>C{<sup>1</sup>H} NMR (100 MHz, CDCl<sub>3</sub>) δ 200.0, 186.7, 167.4, 166.4 (d, *J* = 254.9 Hz), 160.7, 147.3 (d, *J* = 10.1 Hz), 135.4 (d, *J* = 1.9 Hz), 134.9, 126.8 (d, *J* = 10.0 Hz), 118.0 (d, *J* = 23.5 Hz), 113.0 (d, *J* = 24.1 Hz), 72.3, 62.6, 26.7, 18.8, 18.3, 14.0. HRMS Calcd for C<sub>17</sub>H<sub>17</sub>O<sub>4</sub>FS<sub>2</sub> [M+H]<sup>+</sup>: 369.0625; Found: 369.0621.

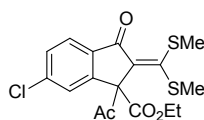

**Ethyl 1-acetyl-2-(bis(methylthio)methylene)-6-chloro-3-oxo-2,3-dihydro-1H-indene-1-carboxylate (3j):** Following the general procedure, pure **3j** was obtained by column chromatography on silica gel (eluent: petroleum ether (60–90 °C)/EtOAc = 20:1, v/v). 56.0 mg, 73% yield, yellow solid, m.p.: 102-103 °C. <sup>1</sup>H NMR (400 MHz, CDCl<sub>3</sub>) δ 7.77 (d, *J* = 8.2 Hz, 1H), 7.65 (d, *J* = 1.5 Hz, 1H), 7.46 (dd, *J* = 8.2, 1.8 Hz, 1H), 4.20 (m, 2H), 2.63 (s, 3H), 2.42 (s, 3H), 2.10 (s, 3H), 1.24 (t, *J* = 7.1 Hz, 3H). <sup>13</sup>C{<sup>1</sup>H} NMR (100 MHz, CDCl<sub>3</sub>) δ 199.6, 186.9, 167.4, 161.4, 146.1, 140.6, 137.5, 134.8, 130.5, 126.1, 125.7, 72.2, 62.6, 26.8, 18.8, 18.3, 14.0. HRMS Calcd for C<sub>17</sub>H<sub>17</sub>O<sub>4</sub>S<sub>2</sub>Cl [M+H]<sup>+</sup>: 385.0330; Found: 385.0339.

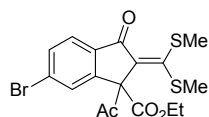

**Ethyl 1-acetyl-2-(bis(methylthio)methylene)-6-bromo-3-oxo-2,3-dihydro-1H-indene-1-carboxylate (3k):** Following the general procedure, pure **3k** was obtained by column

chromatography on silica gel (eluent: petroleum ether (60–90 °C)/EtOAc = 20:1, v/v). 61.2 mg, 71% yield, yellow solid, m.p.: 127-128 °C. <sup>1</sup>H NMR (400 MHz, CDCl<sub>3</sub>) δ 7.83 (d, *J* = 1.4 Hz, 1H), 7.71 (d, *J* = 8.1 Hz, 1H), 7.63 (dd, *J* = 8.1, 1.6 Hz, 1H), 4.26 – 4.15 (m, 2H), 2.64 (s, 3H), 2.43 (s, 3H), 2.11 (s, 3H), 1.24 (t, *J* = 7.1 Hz, 3H). <sup>13</sup>C{<sup>1</sup>H} NMR (100 MHz, CDCl<sub>3</sub>) δ 199.7, 187.1, 167.4, 161.5, 146.2, 137.9, 134.7, 133.4, 129.3, 129.1, 125.8, 72.2, 62.6, 26.8, 18.9, 18.4, 14.1. HRMS Calcd for C<sub>17</sub>H<sub>17</sub>O<sub>4</sub>S<sub>2</sub>Br [M+H]<sup>+</sup>: 428.9824; Found: 428.9823.

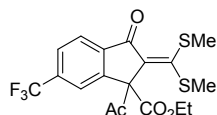

**Ethyl 1-acetyl-2-(bis(methylthio)methylene)-3-oxo-6-(trifluoromethyl)-2,3-dihydro-1H-indene-1-carboxylate (3l)**: Following the general procedure, pure **3l** was obtained by column chromatography on silica gel (eluent: petroleum ether (60–90 °C)/EtOAc = 20:1, v/v). 57.2 mg, 68% yield, yellow solid, m.p.: 106-107 °C. <sup>1</sup>H NMR (400 MHz, CDCl<sub>3</sub>) δ 7.96 (d, *J* = 8.2 Hz, 2H), 7.77 (d, *J* = 8.2 Hz, 1H), 4.29 – 4.16 (m, 2H), 2.67 (s, 3H), 2.46 (s, 3H), 2.12 (s, 3H), 1.23 (t, *J* = 7.2 Hz, 3H). <sup>13</sup>C{<sup>1</sup>H} NMR (100 MHz, CDCl<sub>3</sub>) δ 199.7, 186.9, 167.2, 163.5, 145.1, 141.6, 135.6 (q, *J* = 32.5 Hz), 134.4, 127.0 (q, *J* = 3.6 Hz), 125.0, 123.5 (q, *J* = 271.6 Hz), 123.3 (q, *J* = 4.0 Hz), 72.6, 62.4, 26.8, 19.1, 18.6, 14.0. HRMS Calcd for C<sub>18</sub>H<sub>17</sub>O<sub>4</sub>F<sub>3</sub>S<sub>2</sub> [M+H]<sup>+</sup>: 419.0593; Found: 419.0596.

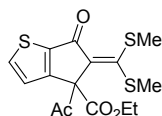

**Ethyl 4-acetyl-5-(bis(methylthio)methylene)-6-oxo-5,6-dihydro-4H-cyclopenta[b]thiophene-4-carboxylate (3m)**: Following the general procedure, pure **3m** was obtained by column chromatography on silica gel (eluent: petroleum ether (60–90 °C)/EtOAc = 20:1, v/v). 41.2 mg, 58% yield, yellow solid, m.p.: 70-71 °C. <sup>1</sup>H NMR (400 MHz, CDCl<sub>3</sub>) δ 7.79 (d, *J* = 4.8 Hz, 1H), 7.17 (d, *J* = 4.8 Hz, 1H), 4.21 (q, *J* = 7.1 Hz, 2H), 2.60 (s, 3H), 2.39 (s, 3H), 2.11 (s, 3H), 1.24 (t, *J* = 7.1 Hz, 3H). <sup>13</sup>C{<sup>1</sup>H} NMR (100 MHz, CDCl<sub>3</sub>) δ 199.3, 181.1, 167.1, 158.4, 155.5, 145.1, 138.5, 137.7, 123.4, 71.3, 62.4, 26.4, 18.7, 18.1, 14.1. HRMS Calcd for C<sub>15</sub>H<sub>16</sub>O<sub>4</sub>S<sub>3</sub> [M+H]<sup>+</sup>: 357.0283; Found: 357.0281.

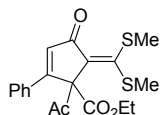

**Ethyl 1-acetyl-5-(bis(methylthio)methylene)-4-oxo-2-phenylcyclopent-2-enecarboxylate**

**(3n)**: Following the general procedure, pure **3n** was obtained by column chromatography on silica gel (eluent: petroleum ether (60–90 °C)/EtOAc = 20:1, v/v). 31.2 mg, 41% yield, yellow oil. <sup>1</sup>H NMR (400 MHz, CDCl<sub>3</sub>) δ 7.60 – 7.52 (m, 2H), 7.45 – 7.34 (m, 3H), 6.91 (s, 1H), 4.11 (q, *J* = 7.1 Hz, 2H), 2.57 (s, 3H), 2.41 (s, 3H), 2.17 (s, 3H), 1.07 (t, *J* = 7.1 Hz, 3H). <sup>13</sup>C{<sup>1</sup>H} NMR (100 MHz, CDCl<sub>3</sub>) δ 199.4, 190.7, 167.1, 162.7, 155.7, 135.4, 134.6, 131.9, 131.1, 128.9, 128.3, 74.0, 62.0, 27.0, 18.5, 18.2, 13.9. HRMS Calcd for C<sub>19</sub>H<sub>20</sub>O<sub>4</sub>S<sub>2</sub> [M+H]<sup>+</sup>: 377.0876; Found: 377.0880.

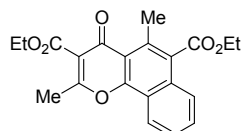

**Diethyl 2,5-dimethyl-4-oxo-4H-benzo[h]chromene-3,6-dicarboxylate (3p')**: Following the general procedure, pure **3p'** was obtained by column chromatography on silica gel (eluent: petroleum ether (60–90 °C)/EtOAc = 20:1, v/v). 32.6 mg, 44% yield, red solid, m.p.: 150-152 °C. <sup>1</sup>H NMR (400 MHz, CDCl<sub>3</sub>) δ 8.40 (d, *J* = 8.3 Hz, 1H), 7.76 – 7.66 (m, 2H), 7.61 (m, 1H), 4.54 (q, *J* = 7.1 Hz, 2H), 4.43 (q, *J* = 7.1 Hz, 2H), 2.88 (s, 3H), 2.58 (s, 3H), 1.43 (m, 6H). <sup>13</sup>C{<sup>1</sup>H} NMR (100 MHz, CDCl<sub>3</sub>) δ 176.0, 169.3, 165.1, 163.7, 154.7, 132.8, 131.7, 130.9, 130.2, 126.9, 124.6, 122.5, 122.4, 121.0, 118.2, 62.0, 61.9, 19.7, 18.9, 14.4, 14.3. HRMS Calcd for C<sub>21</sub>H<sub>20</sub>O<sub>6</sub> [M+H]<sup>+</sup>: 369.1333; Found: 369.1341.

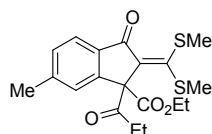

**Ethyl 2-(bis(methylthio)methylene)-6-methyl-3-oxo-1-propionyl-2,3-dihydro-1H-indene-1-carboxylate (4a)**: Following the general procedure, pure **4a** was obtained by column chromatography on silica gel (eluent: petroleum ether (60–90 °C)/EtOAc = 20:1, v/v). 63.3 mg, 83% yield, yellow oil. <sup>1</sup>H NMR (400 MHz, CDCl<sub>3</sub>) δ 7.71 (d, *J* = 7.8 Hz, 1H), 7.42 (s, 1H), 7.27 (d, *J* = 8.4 Hz, 1H), 4.25 – 4.09 (m, 2H), 2.60 (s, 3H), 2.53 – 2.35 (m, 7H), 2.23 (m, 1H), 1.21 (t, *J* = 7.1 Hz, 3H), 0.93 (t, *J* = 7.2 Hz, 3H). <sup>13</sup>C{<sup>1</sup>H} NMR (100 MHz, CDCl<sub>3</sub>) δ 203.3, 188.2, 167.9, 159.0, 145.7, 145.5, 136.8, 135.9, 130.9, 125.9, 124.3, 72.1, 62.2, 31.8, 22.3, 18.7, 18.2, 14.0, 8.5. HRMS Calcd for C<sub>19</sub>H<sub>22</sub>O<sub>4</sub>S<sub>2</sub> [M+H]<sup>+</sup>: 379.1032; Found: 379.1028.

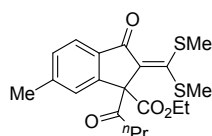



**Ethyl 2-(bis(methylthio)methylene)-1-butyryl-6-methyl-3-oxo-2,3-dihydro-1H-indene-1-carboxylate (4b):** Following the general procedure, pure **4b** was obtained by column chromatography on silica gel (eluent: petroleum ether (60–90 °C)/EtOAc = 20:1, v/v). 56.2 mg, 72% yield, yellow solid, m.p.: 88-89 °C. <sup>1</sup>H NMR (400 MHz, CDCl<sub>3</sub>) δ 7.71 (d, *J* = 7.8 Hz, 1H), 7.42 (s, 1H), 7.28 (d, *J* = 7.8 Hz, 1H), 4.25 – 4.07 (m, 2H), 2.60 (s, 3H), 2.48 – 2.30 (m, 7H), 2.15 (m, 1H), 1.55 – 1.36 (m, 2H), 1.21 (t, *J* = 7.1 Hz, 3H), 0.72 (t, *J* = 7.4 Hz, 3H). <sup>13</sup>C{<sup>1</sup>H} NMR (100 MHz, CDCl<sub>3</sub>) δ 202.3, 188.2, 167.8, 159.2, 145.7, 145.4, 136.8, 135.7, 130.9, 126.0, 124.3, 72.1, 62.1, 40.2, 22.3, 18.7, 18.2, 17.6, 14.0, 13.5. HRMS Calcd for C<sub>20</sub>H<sub>24</sub>O<sub>4</sub>S<sub>2</sub> [M+H]<sup>+</sup>: 393.1189; Found: 393.1191.

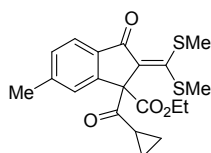

**Ethyl 2-(bis(methylthio)methylene)-1-(cyclopropanecarbonyl)-6-methyl-3-oxo-2,3-dihydro-1H-indene-1-carboxylate (4c):** Following the general procedure, pure **4c** was obtained by column chromatography on silica gel (eluent: petroleum ether (60–90 °C)/EtOAc = 20:1, v/v). 57.2 mg, 73% yield, yellow solid, m.p.: 138-139 °C. <sup>1</sup>H NMR (400 MHz, CDCl<sub>3</sub>) δ 7.70 (d, *J* = 7.8 Hz, 1H), 7.44 (s, 1H), 7.30 – 7.24 (m, 1H), 4.22 – 4.08 (m, 2H), 2.60 (s, 3H), 2.39 (m, 6H), 1.71 – 1.59 (m, 1H), 1.20 (t, *J* = 7.1 Hz, 3H), 1.07 – 0.91 (m, 2H), 0.79 (m, 1H), 0.69 – 0.57 (m, 1H). <sup>13</sup>C{<sup>1</sup>H} NMR (100 MHz, CDCl<sub>3</sub>) δ 202.4, 188.4, 167.5, 159.9, 145.6, 145.4, 136.9, 135.3, 130.9, 126.5, 124.1, 72.3, 62.1, 22.3, 19.0, 18.1, 17.9, 14.0, 12.9, 12.4. HRMS Calcd for C<sub>20</sub>H<sub>22</sub>O<sub>4</sub>S<sub>2</sub> [M+H]<sup>+</sup>: 391.1032; Found: 391.1034.

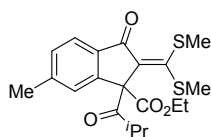

**Ethyl 2-(bis(methylthio)methylene)-1-isobutyryl-6-methyl-3-oxo-2,3-dihydro-1H-indene-1-carboxylate (4d):** Following the general procedure, pure **4d** was obtained by column chromatography on silica gel (eluent: petroleum ether (60–90 °C)/EtOAc = 20:1, v/v). 55.0 mg, 70% yield, yellow solid, m.p.: 84-85 °C. <sup>1</sup>H NMR (400 MHz, CDCl<sub>3</sub>) δ 7.75 (d, *J* = 7.8 Hz, 1H), 7.50 (s, 1H), 7.30 (d, *J* = 7.7 Hz, 1H), 4.24 – 4.12 (m, 2H), 2.67 (m, 1H), 2.61 (s, 3H), 2.42 (d, 6H), 1.21 (t, *J* = 7.1 Hz, 3H), 0.94 (d, *J* = 6.7 Hz, 3H), 0.75 (d, *J* = 6.7 Hz, 3H). <sup>13</sup>C{<sup>1</sup>H} NMR

(100 MHz, CDCl<sub>3</sub>) δ 206.1, 188.2, 167.9, 160.2, 145.5, 145.0, 137.2, 134.6, 131.0, 126.2, 124.5, 72.1, 62.1, 37.0, 22.3, 21.8, 20.9, 18.9, 18.4, 14.1. HRMS Calcd for C<sub>20</sub>H<sub>24</sub>O<sub>4</sub>S<sub>2</sub> [M+H]<sup>+</sup>: 393.1189; Found: 393.1192.

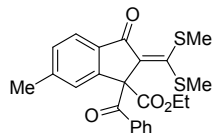

**Ethyl 1-benzoyl-2-(bis(methylthio)methylene)-6-methyl-3-oxo-2,3-dihydro-1H-indene-1-carboxylate (4e):** Following the general procedure, pure **4e** was obtained by column chromatography on silica gel (eluent: petroleum ether (60–90 °C)/EtOAc = 20:1, v/v). 56.2 mg, 66% yield, yellow solid, m.p.: 114–115 °C. <sup>1</sup>H NMR (400 MHz, CDCl<sub>3</sub>) δ 7.79 (d, *J* = 7.8 Hz, 1H), 7.43 – 7.28 (m, 5H), 7.18 (t, *J* = 7.7 Hz, 2H), 4.26 – 4.13 (m, 2H), 2.46 (s, 3H), 2.36 (s, 3H), 1.65 (s, 3H), 1.24 (t, *J* = 7.1 Hz, 3H). <sup>13</sup>C{<sup>1</sup>H} NMR (100 MHz, CDCl<sub>3</sub>) δ 194.5, 188.5, 167.6, 159.7, 146.0, 145.8, 136.8, 135.7, 135.1, 132.6, 130.9, 128.7, 128.2, 127.4, 124.4, 72.1, 62.7, 22.3, 18.3, 17.8, 14.0. HRMS Calcd for C<sub>23</sub>H<sub>22</sub>O<sub>4</sub>S<sub>2</sub> [M+H]<sup>+</sup>: 427.1032; Found: 427.1028.

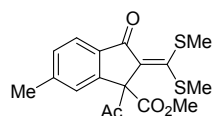

**Methyl 1-acetyl-2-(bis(methylthio)methylene)-6-methyl-3-oxo-2,3-dihydro-1H-indene-1-carboxylate (4f):** Following the general procedure, pure **4f** was obtained by column chromatography on silica gel (eluent: petroleum ether (60–90 °C)/EtOAc = 20:1, v/v). 57.4 mg, 82% yield, yellow solid, m.p.: 110–111 °C. <sup>1</sup>H NMR (400 MHz, CDCl<sub>3</sub>) δ 7.71 (d, *J* = 7.8 Hz, 1H), 7.42 (s, 1H), 7.28 (d, *J* = 7.8 Hz, 1H), 3.69 (s, 3H), 2.60 (s, 3H), 2.41 (s, 3H), 2.39 (s, 3H), 2.03 (s, 3H). <sup>13</sup>C{<sup>1</sup>H} NMR (100 MHz, CDCl<sub>3</sub>) δ 200.0, 188.0, 168.4, 159.1, 145.9, 145.0, 136.8, 135.7, 131.1, 125.8, 124.4, 72.0, 53.1, 26.5, 22.3, 18.6, 18.0. HRMS Calcd for C<sub>17</sub>H<sub>18</sub>O<sub>4</sub>S<sub>2</sub> [M+H]<sup>+</sup>: 351.0719; Found: 351.0722.

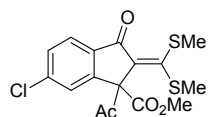

**Methyl 1-acetyl-2-(bis(methylthio)methylene)-6-chloro-3-oxo-2,3-dihydro-1H-indene-1-carboxylate (4g):** Following the general procedure, pure **4g** was obtained by column chromatography on silica gel (eluent: petroleum ether (60–90 °C)/EtOAc = 20:1, v/v). 55.3 mg, 74% yield, yellow solid, m.p.: 106–107 °C. <sup>1</sup>H NMR (400 MHz, CDCl<sub>3</sub>) δ 7.77 (d, *J* = 8.2 Hz,

1H), 7.64 (d,  $J = 1.7$  Hz, 1H), 7.47 (dd,  $J = 8.2, 1.8$  Hz, 1H), 3.74 (s, 3H), 2.64 (s, 3H), 2.42 (s, 3H), 2.09 (s, 3H).  $^{13}\text{C}\{^1\text{H}\}$  NMR (100 MHz,  $\text{CDCl}_3$ )  $\delta$  199.5, 186.8, 167.9, 161.5, 145.9, 140.7, 137.5, 134.6, 130.7, 126.1, 125.7, 72.1, 53.4, 26.7, 18.9, 18.3. HRMS Calcd for  $\text{C}_{16}\text{H}_{15}\text{O}_4\text{S}_2\text{Cl}$   $[\text{M}+\text{H}]^+$ : 371.0173; Found: 371.0174.

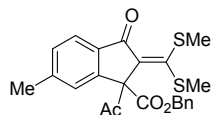

**Benzyl 1-acetyl-2-(bis(methylthio)methylene)-6-methyl-3-oxo-2,3-dihydro-1H-indene-1-carboxylate (4h):** Following the general procedure, pure **4h** was obtained by column chromatography on silica gel (eluent: petroleum ether (60–90 °C)/EtOAc = 20:1, v/v). 62.1 mg, 73% yield, yellow solid, m.p.: 80–81 °C.  $^1\text{H}$  NMR (400 MHz,  $\text{CDCl}_3$ )  $\delta$  7.72 (d,  $J = 7.8$  Hz, 1H), 7.39 (s, 1H), 7.27 (m, 4H), 7.21 (m, 2H), 5.18 (d,  $J = 12.4$  Hz, 1H), 5.09 (d,  $J = 12.4$  Hz, 1H), 2.55 (s, 3H), 2.37 (s, 3H), 2.28 (s, 3H), 2.05 (s, 3H).  $^{13}\text{C}\{^1\text{H}\}$  NMR (100 MHz,  $\text{CDCl}_3$ )  $\delta$  200.0, 187.9, 167.6, 159.3, 145.8, 144.9, 136.8, 135.5, 135.2, 131.0, 128.4, 128.3, 128.1, 125.9, 124.4, 72.1, 67.7, 26.6, 22.2, 18.5, 18.1. HRMS Calcd for  $\text{C}_{23}\text{H}_{22}\text{O}_4\text{S}_2$   $[\text{M}+\text{H}]^+$ : 427.1032; Found: 427.1033.

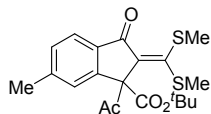

**tert-Butyl 1-acetyl-2-(bis(methylthio)methylene)-6-methyl-3-oxo-2,3-dihydro-1H-indene-1-carboxylate (4i):** Following the general procedure, pure **4i** was obtained by column chromatography on silica gel (eluent: petroleum ether (60–90 °C)/EtOAc = 20:1, v/v). 36.3 mg, 46% yield, yellow solid, m.p.: 113–114 °C.  $^1\text{H}$  NMR (400 MHz,  $\text{CDCl}_3$ )  $\delta$  7.73 (d,  $J = 7.8$  Hz, 1H), 7.44 (s, 1H), 7.29 (d,  $J = 7.3$  Hz, 1H), 2.62 (s, 3H), 2.43 (s, 3H), 2.41 (s, 3H), 2.06 (s, 3H), 1.42 (s, 9H).  $^{13}\text{C}\{^1\text{H}\}$  NMR (100 MHz,  $\text{CDCl}_3$ )  $\delta$  200.7, 188.4, 166.6, 158.6, 145.8, 145.6, 136.8, 136.5, 130.8, 126.0, 124.4, 83.0, 73.1, 27.9, 26.9, 22.4, 18.6, 18.2. HRMS Calcd for  $\text{C}_{20}\text{H}_{24}\text{O}_4\text{S}_2$   $[\text{M}+\text{H}]^+$ : 393.1189; Found: 393.1188.

## 5. Copies of NMR spectra

I045  
I045 1H NMR in CDCl3

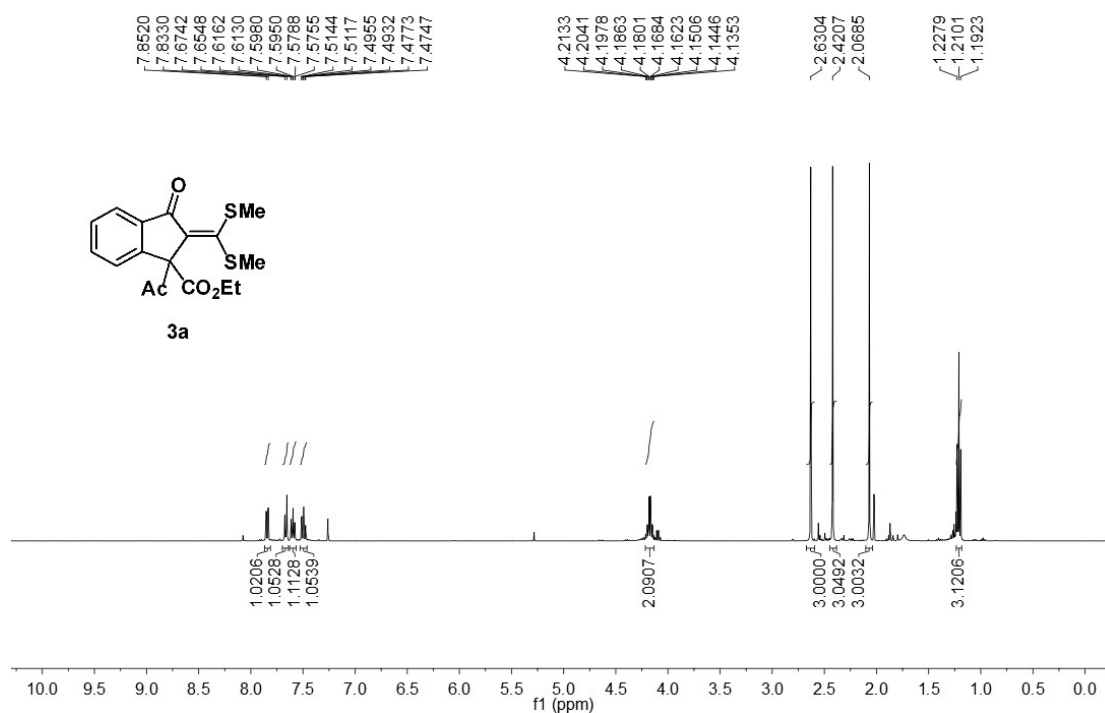

I045  
I045 13C NMR in CDCl3

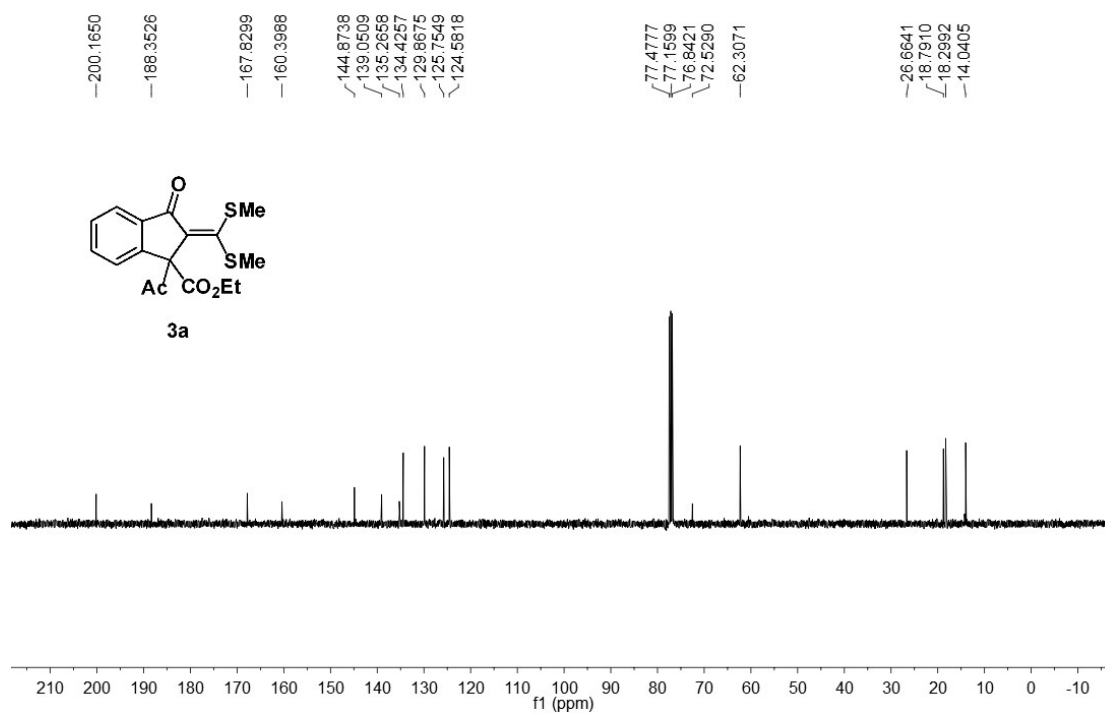

I043  
I043 1H NMR in CDC13

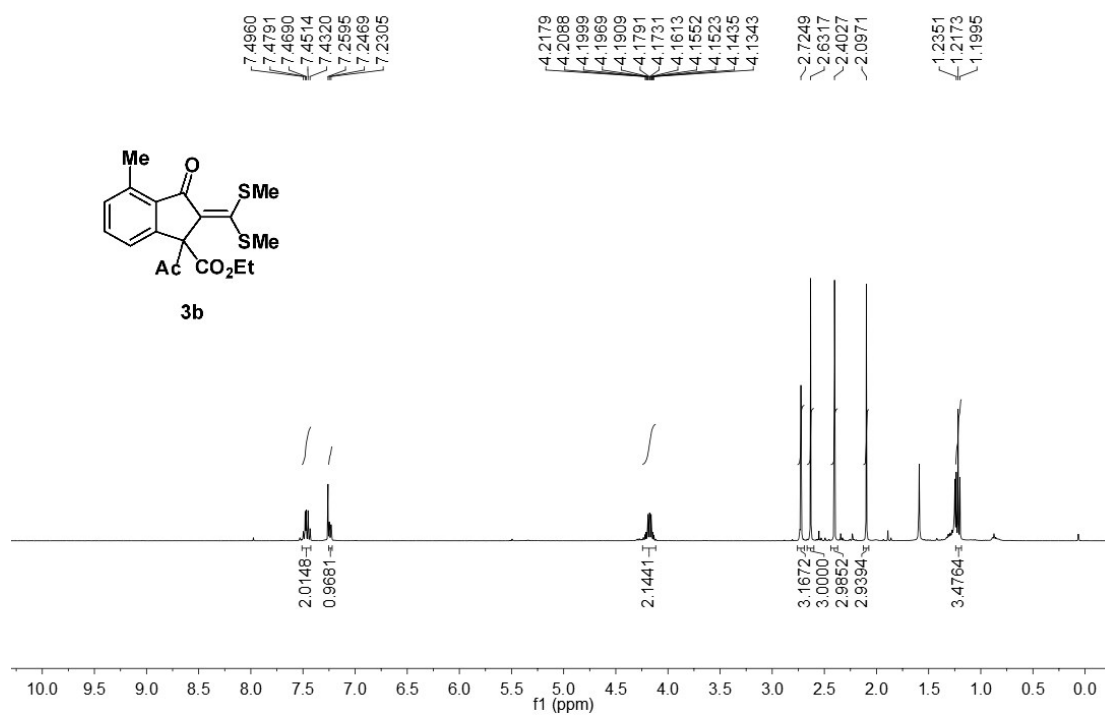

I043  
I043 13C NMR in CDC13

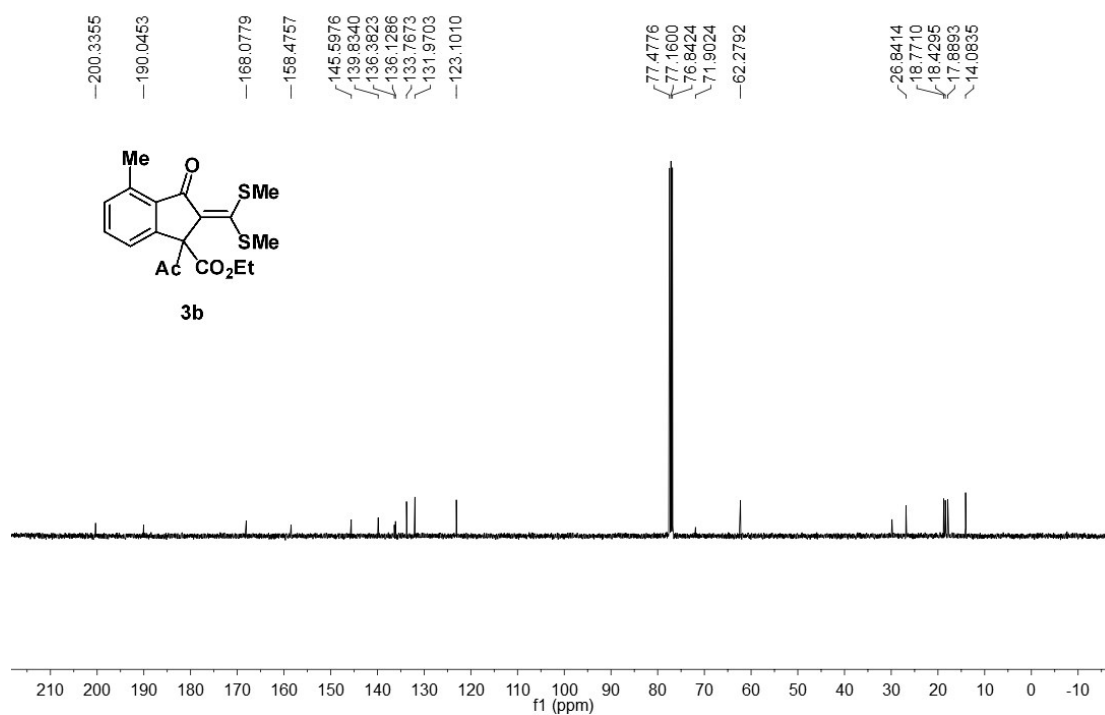

I044  
I044 1H NMR in CDC13

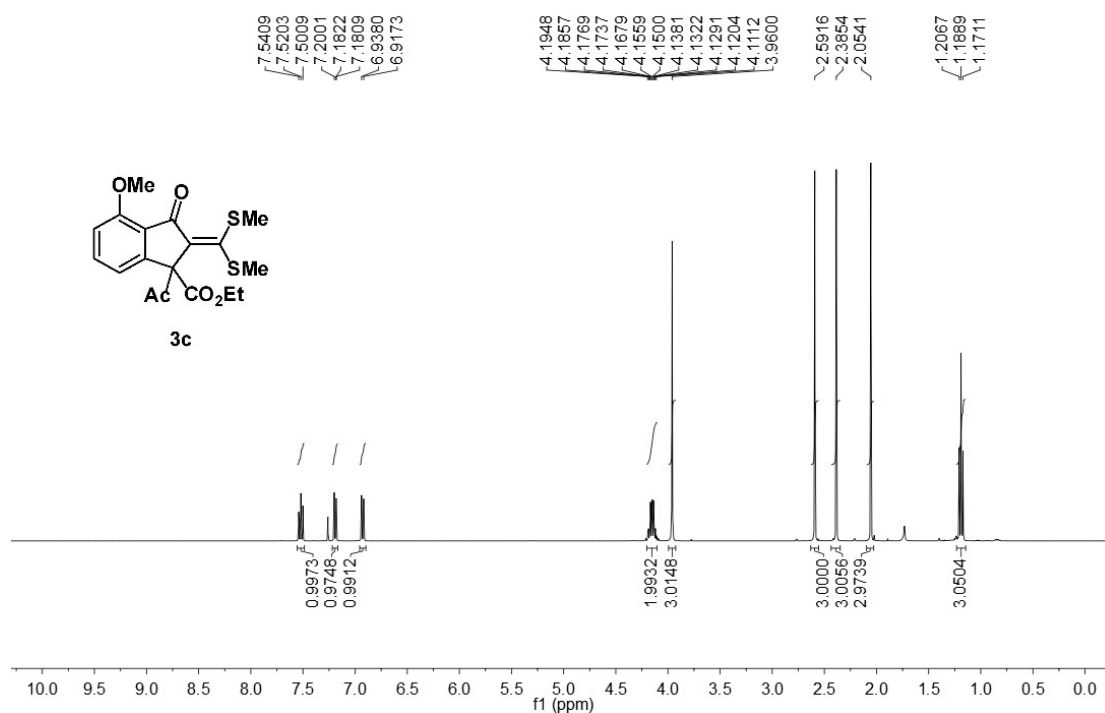

I044  
I044 13C NMR in CDC13

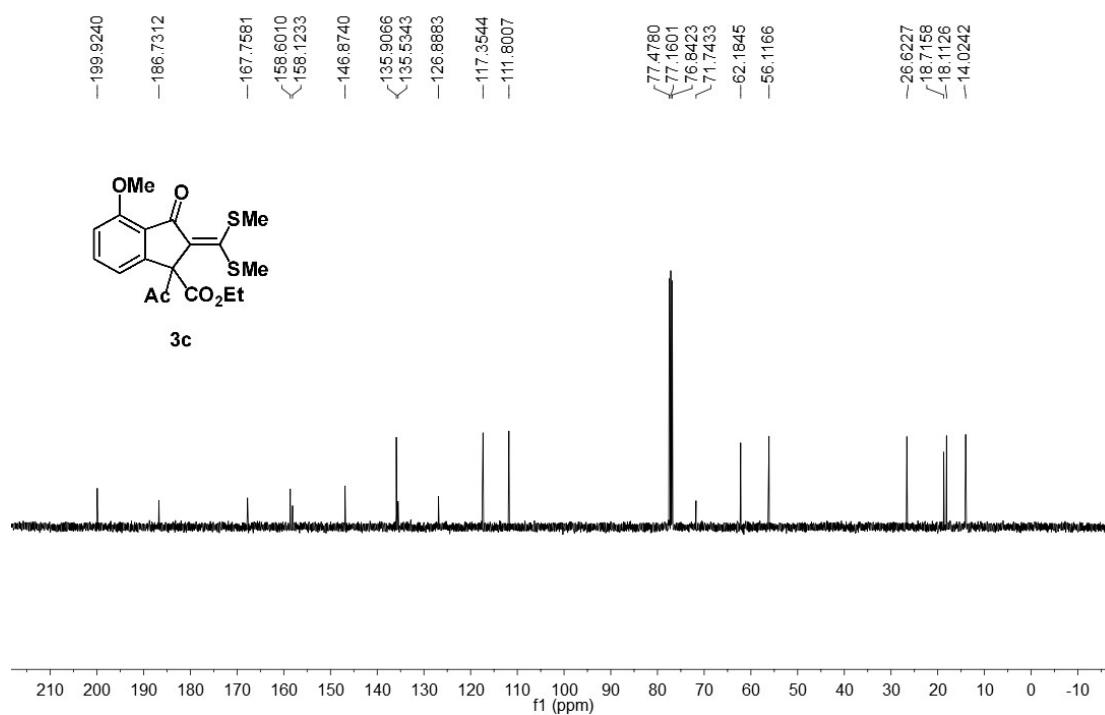

2020630-1-F  
1H NMR 2020630-1-F in CDCl3

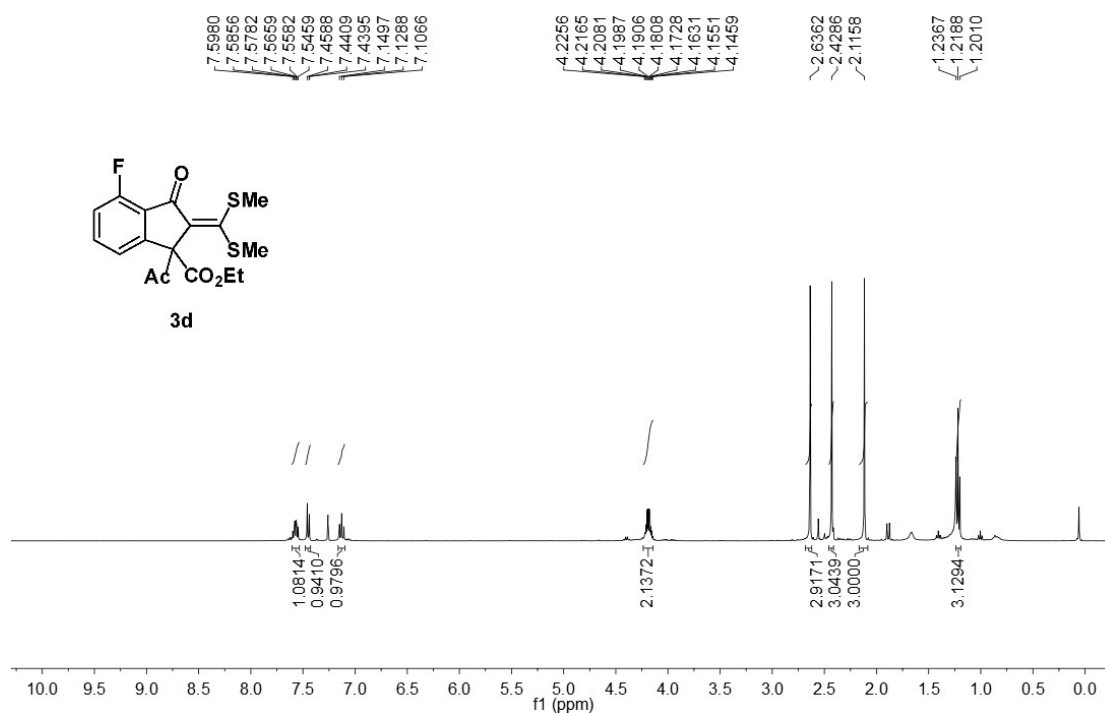

2020630-1-F  
13C NMR 2020630-1-F in CDCl3

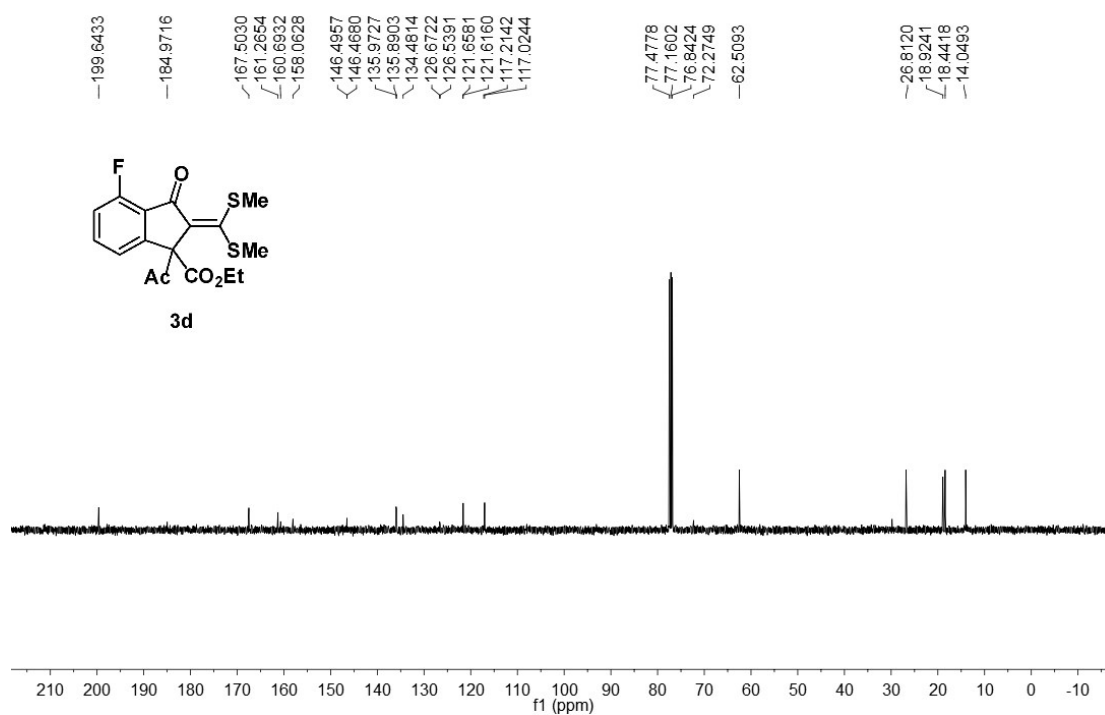

I049  
I049 <sup>1</sup>H NMR in CDCl<sub>3</sub>

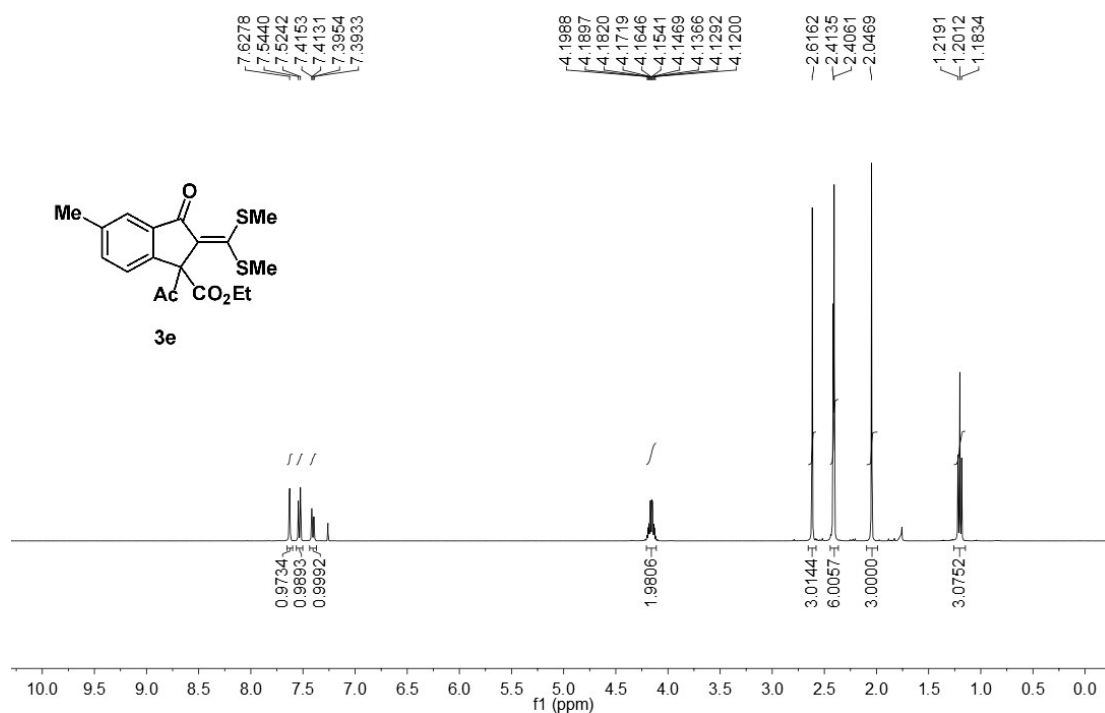

I049  
I049 <sup>13</sup>C NMR in CDCl<sub>3</sub>

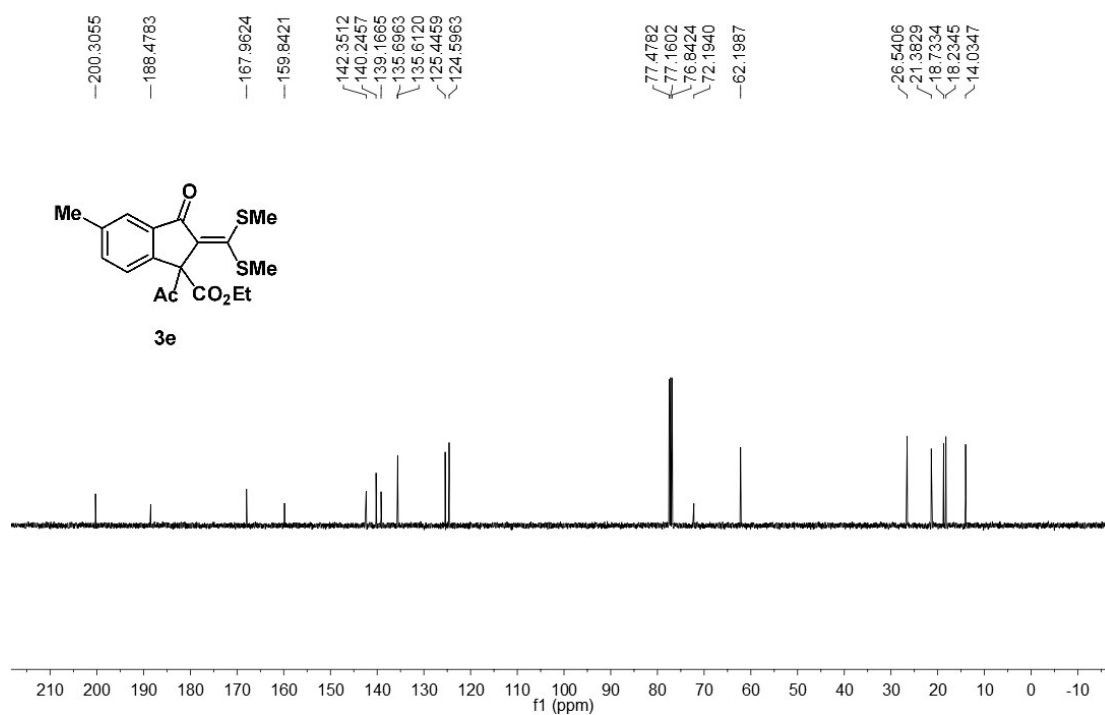



I050P1  
I050P1 1H NMR in CDC13

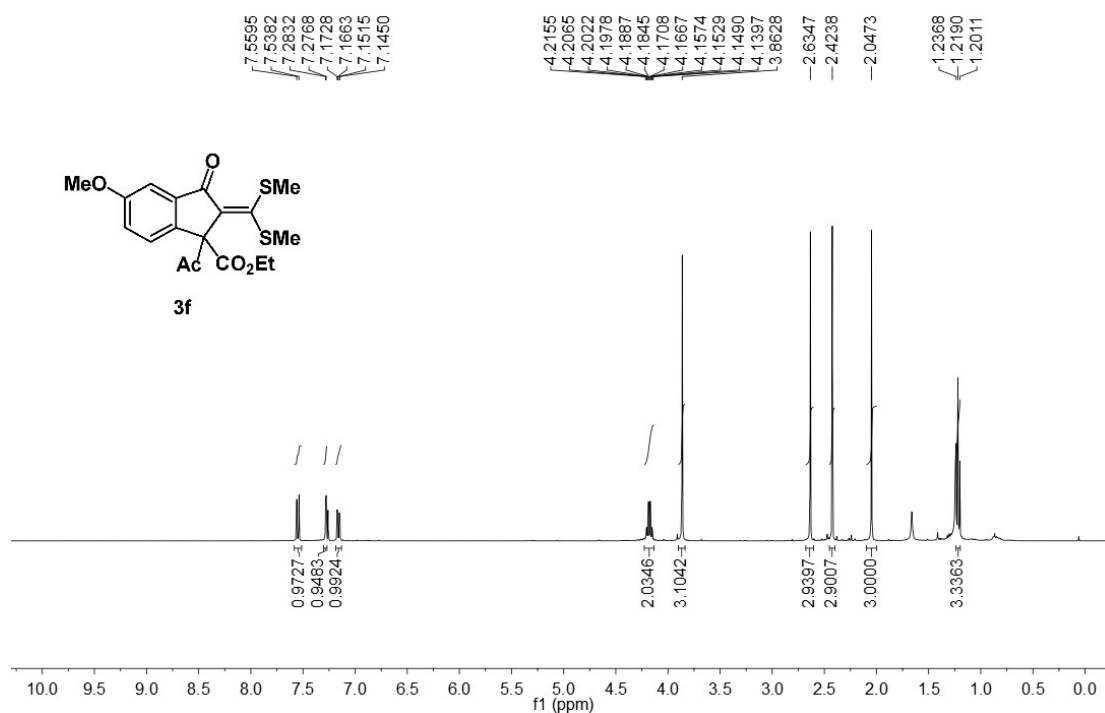

I050P1  
I050P1 13C NMR in CDC13

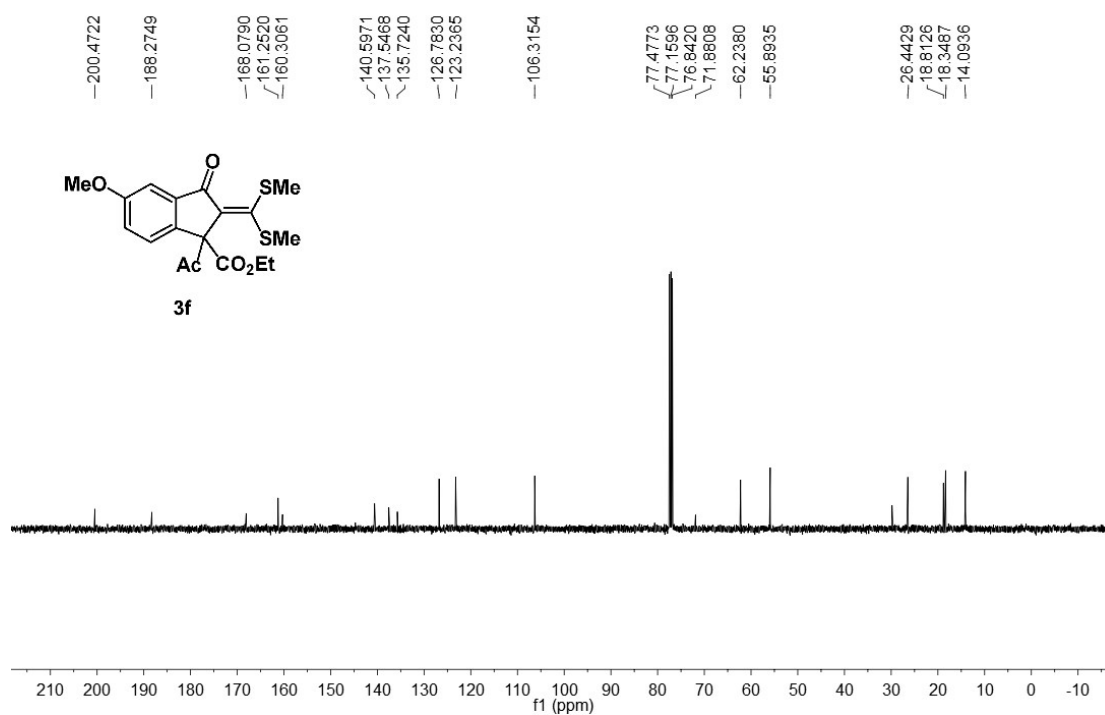

I050P2  
I050 P2 1H NMR in CDCl3

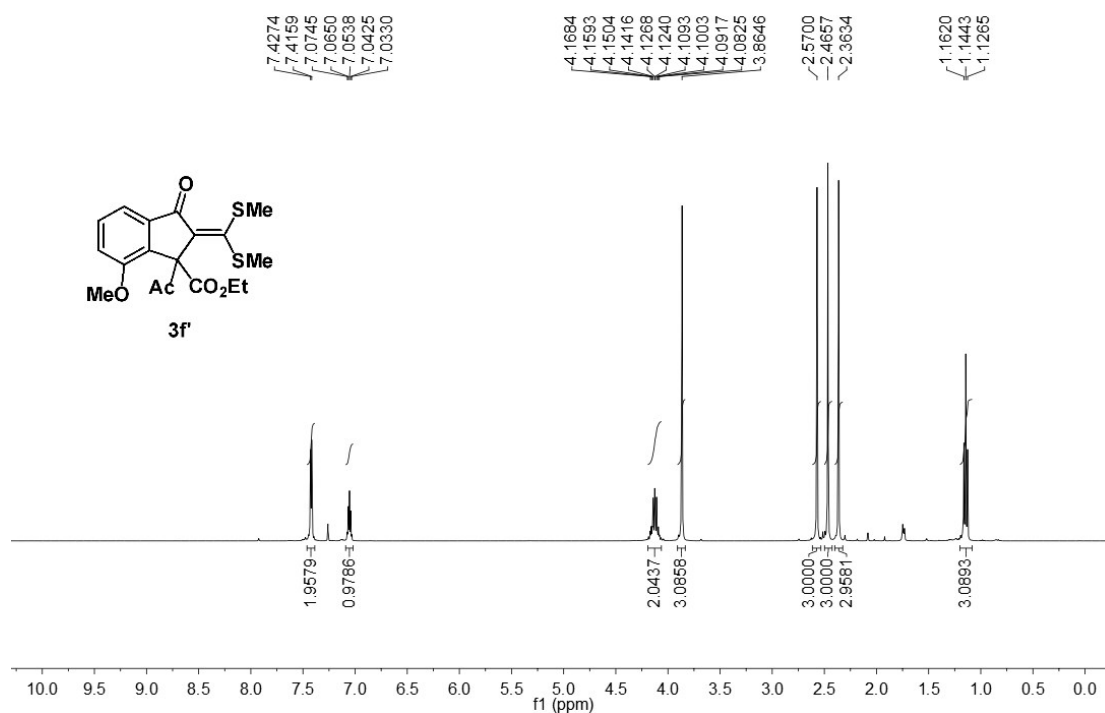

I050P2  
I050 P2 13C NMR in CDCl3

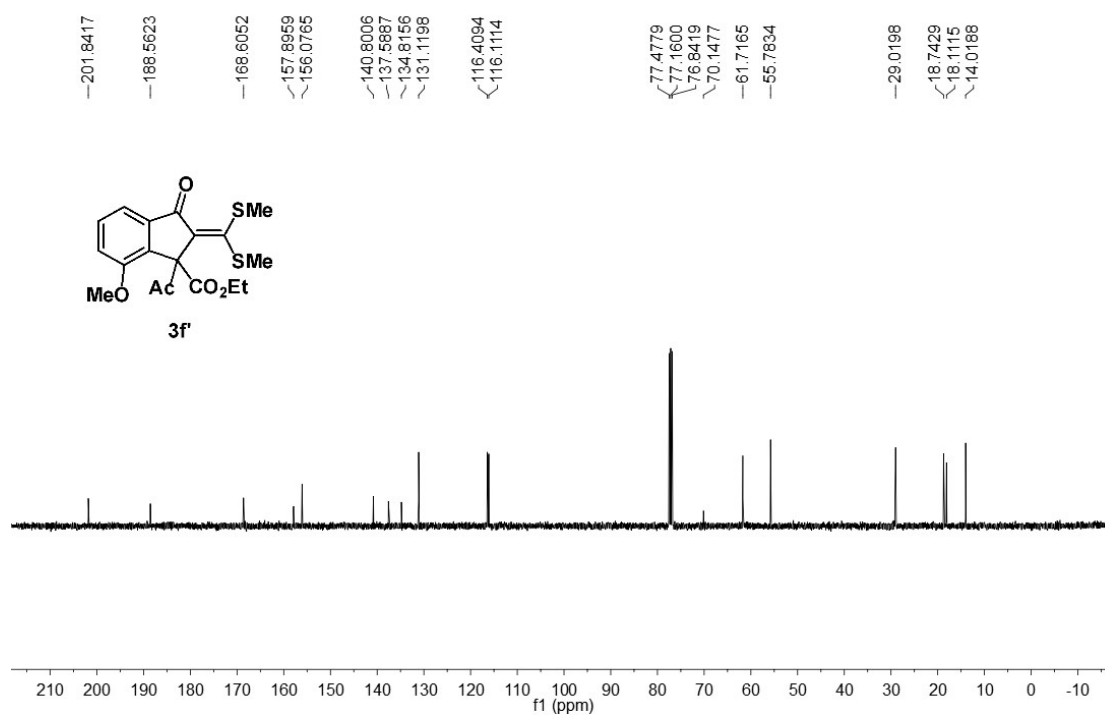

0725\_NMR  
I026 1H NMR in CDC13

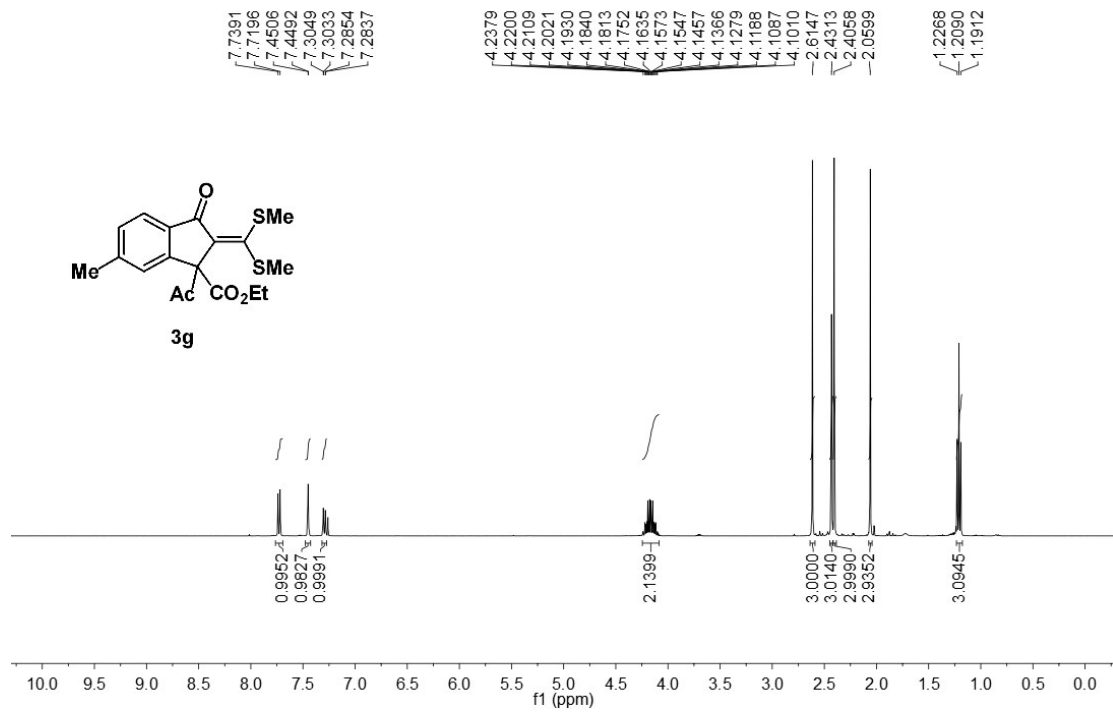

0725\_NMR  
I026 13C NMR in CDC13

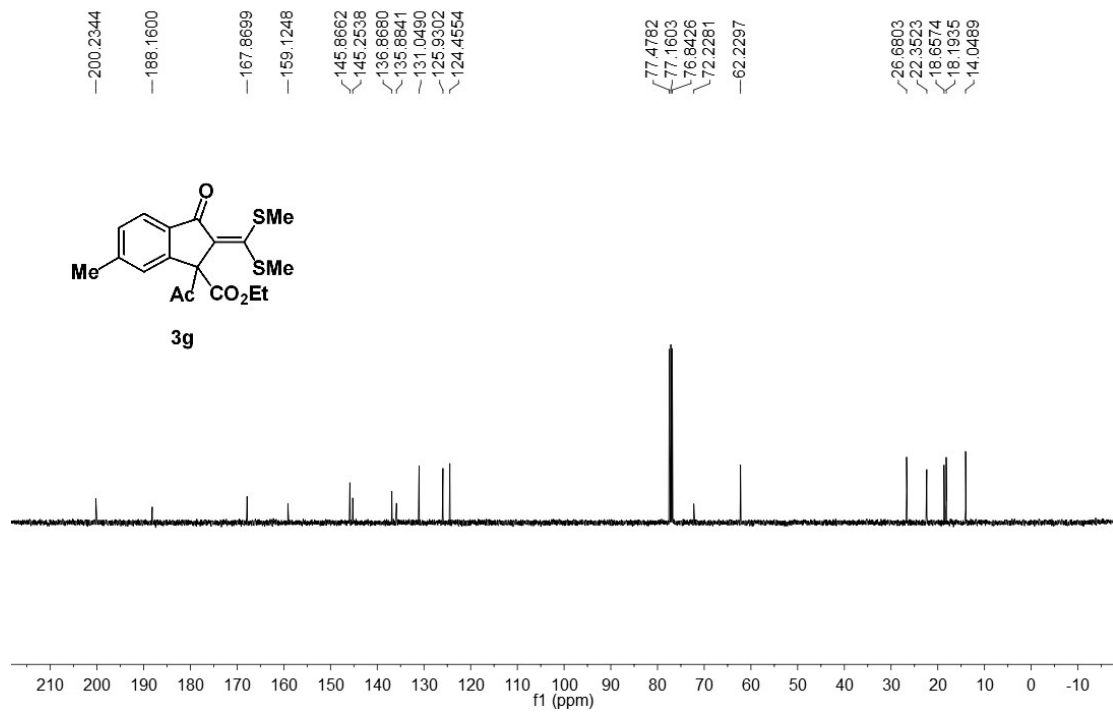

I023  
I023 1H NMR in CDC13

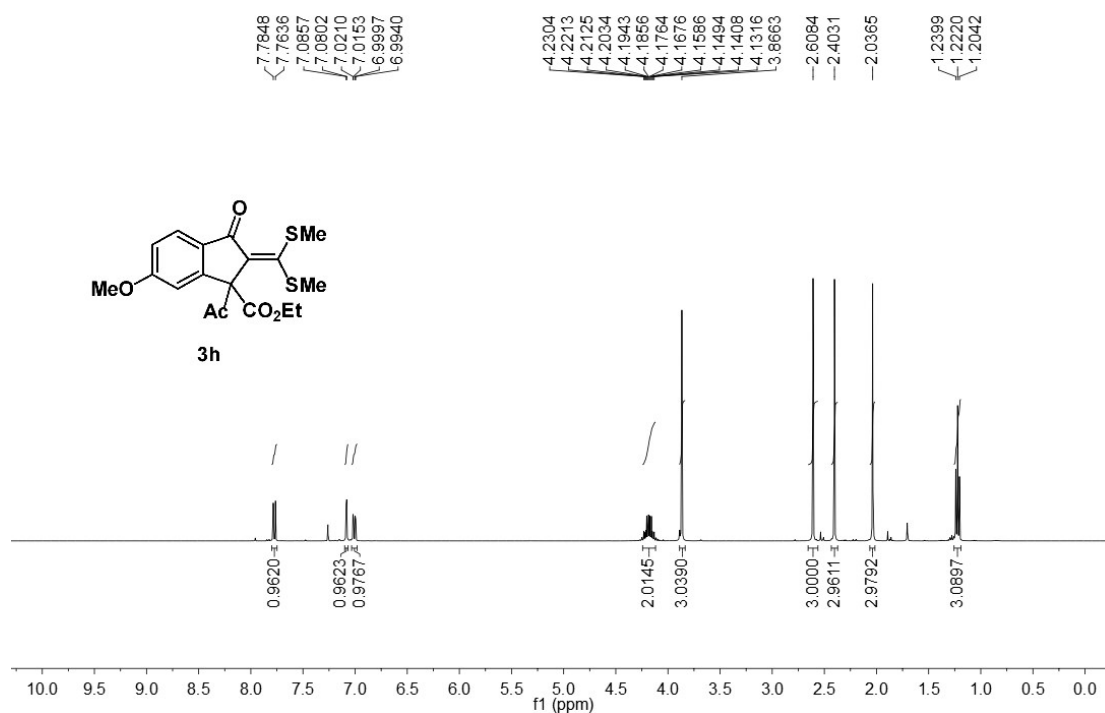

I023  
I023 13C NMR in CDC13

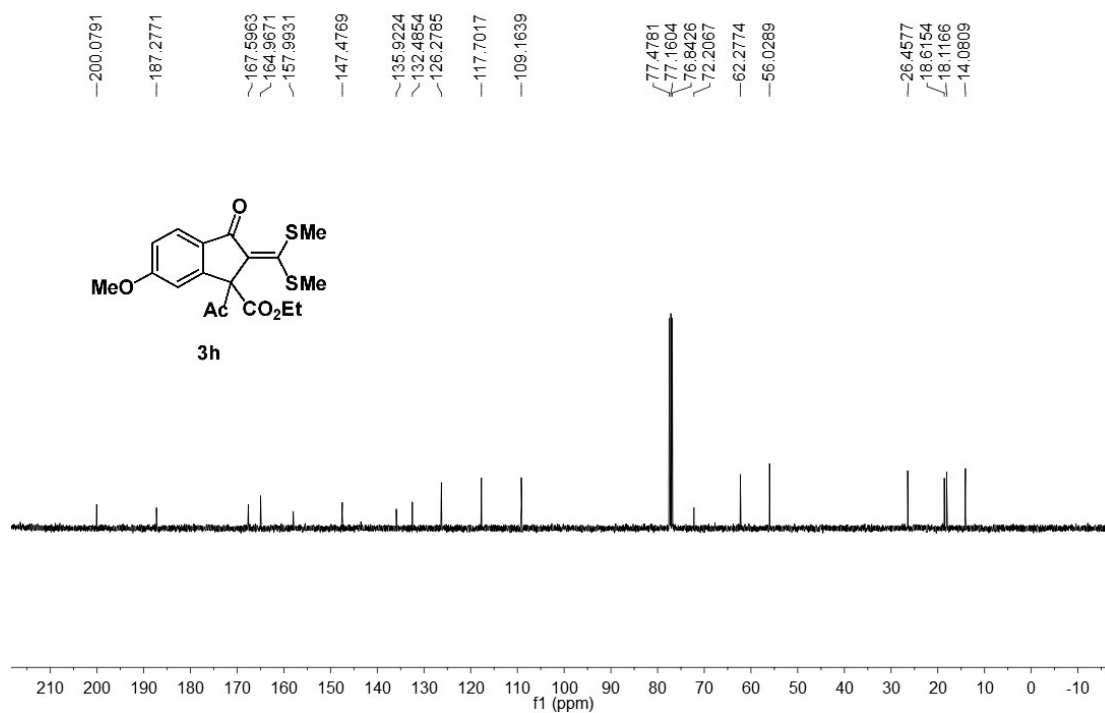

I047  
I047 1H NMR in CDCl3

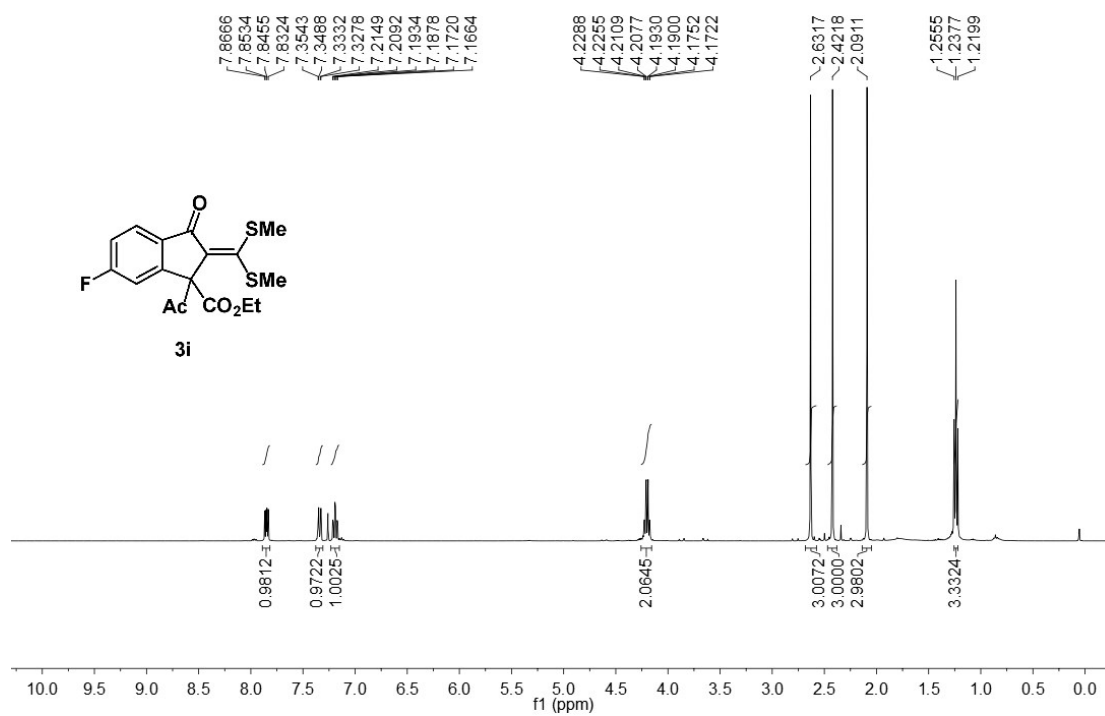

I047  
I047 13C NMR in CDCl3

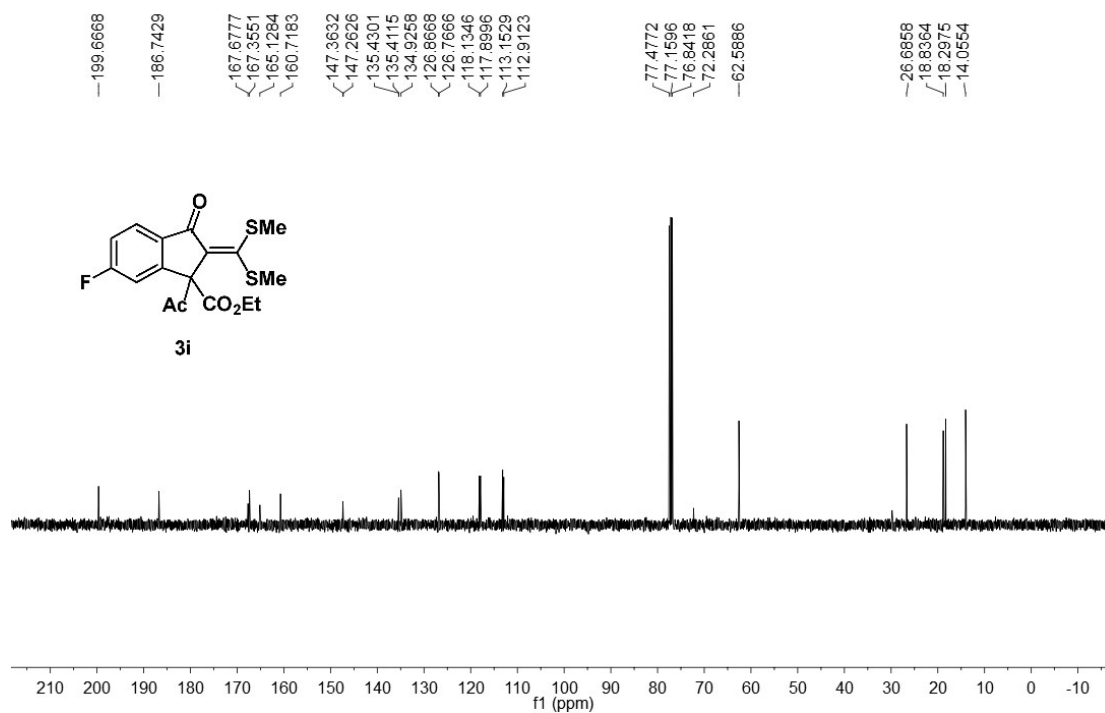

I041  
I041 1H NMR in CDC13

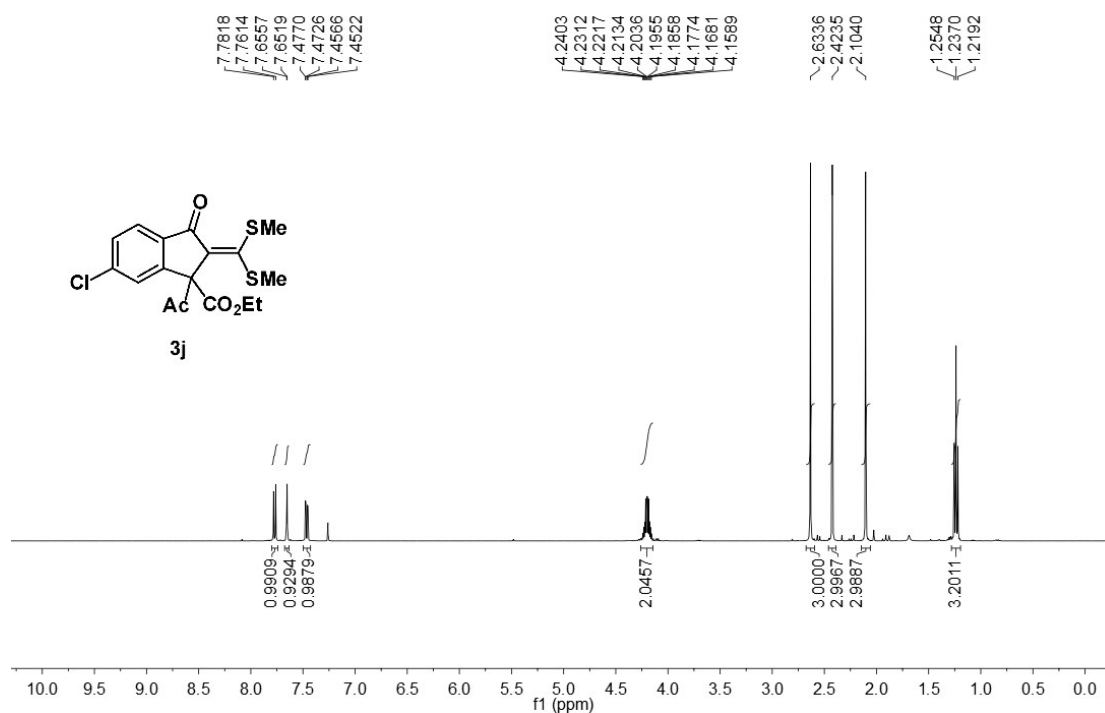

I041  
I041 13C NMR in CDC13

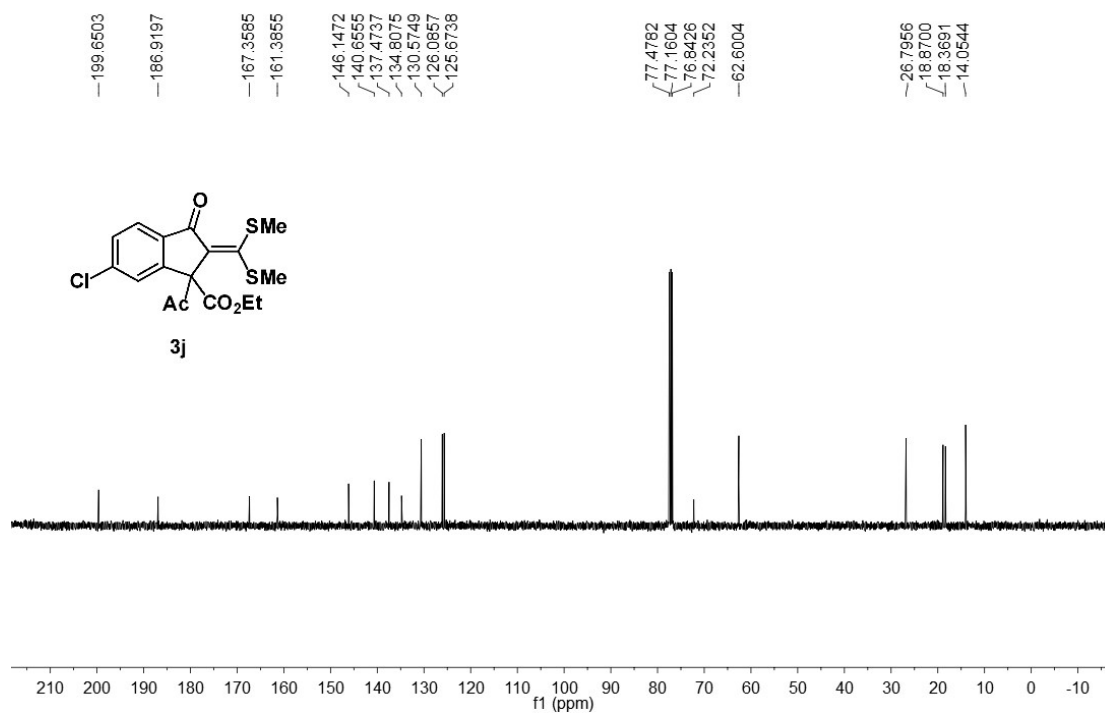

I039  
I039 1H NMR in CDCl3

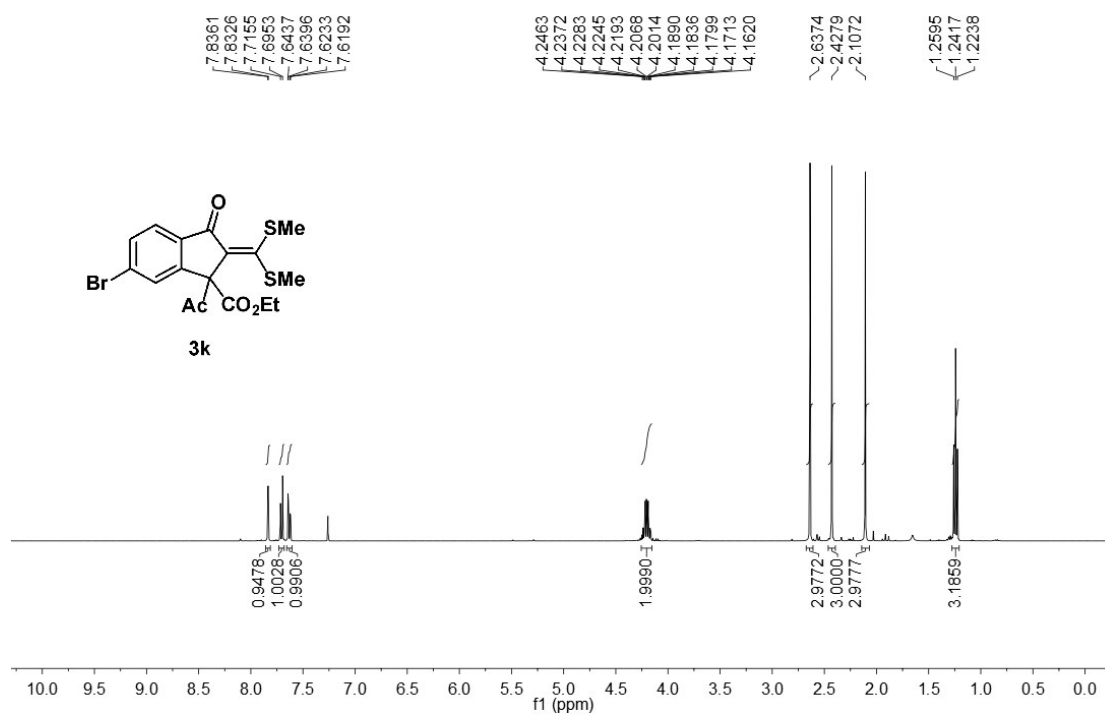

I039  
I039 13C NMR in CDCl3

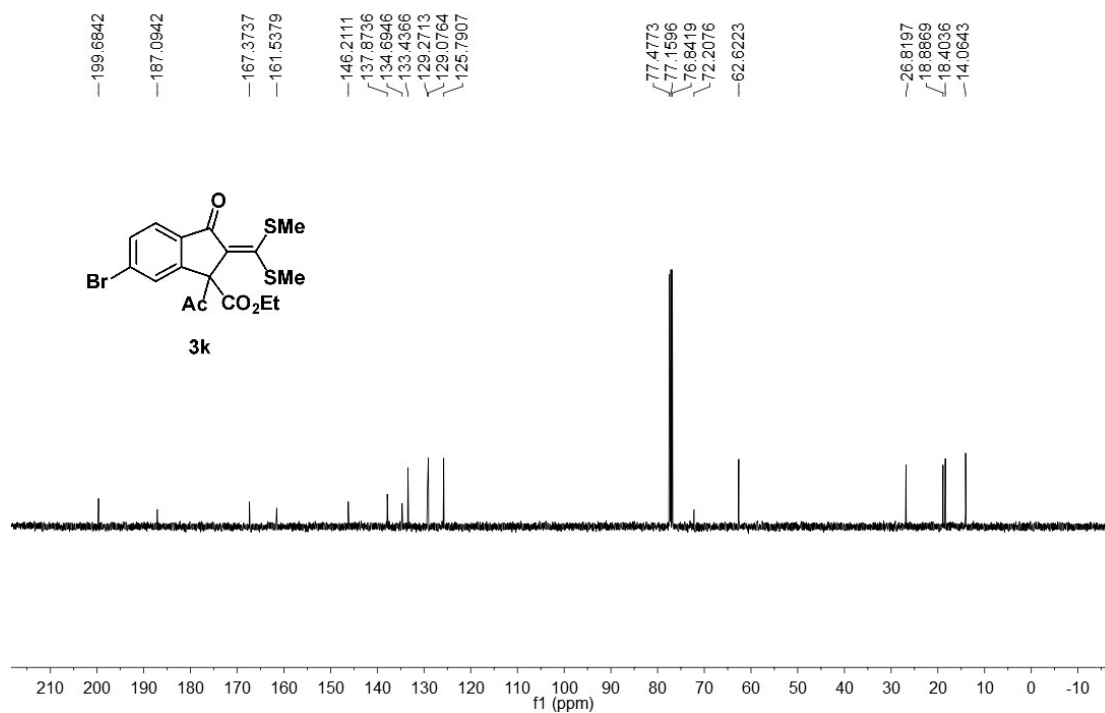

I048  
I048 1H NMR in CDCl3

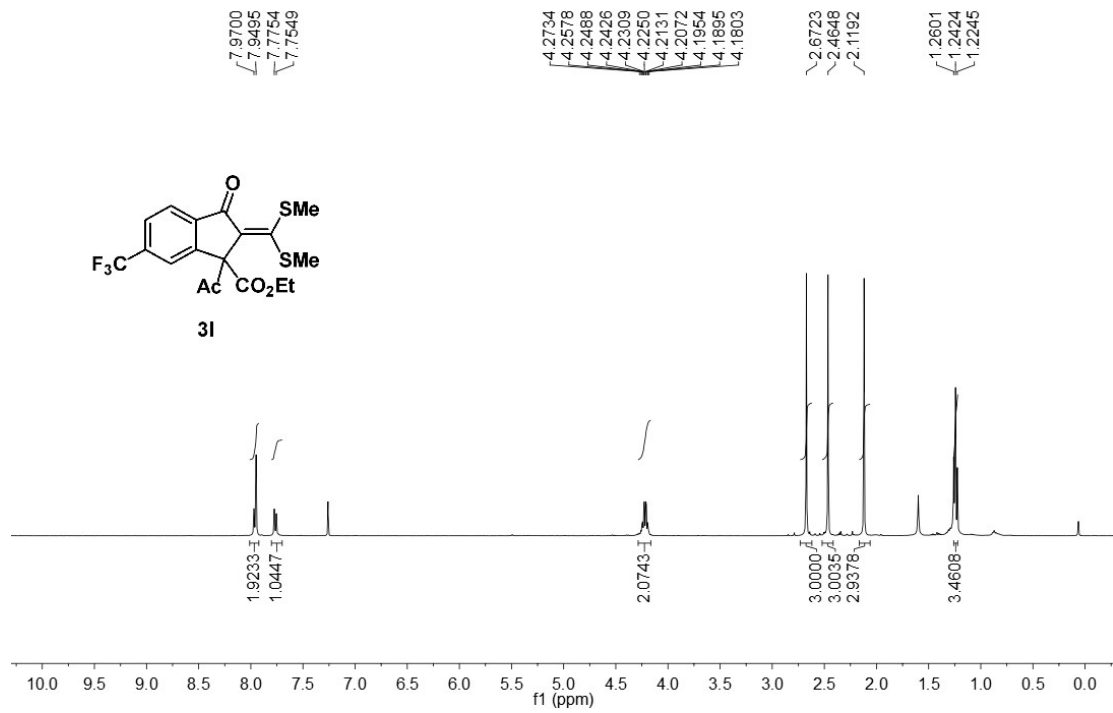

I048  
I048 13C NMR in CDCl3

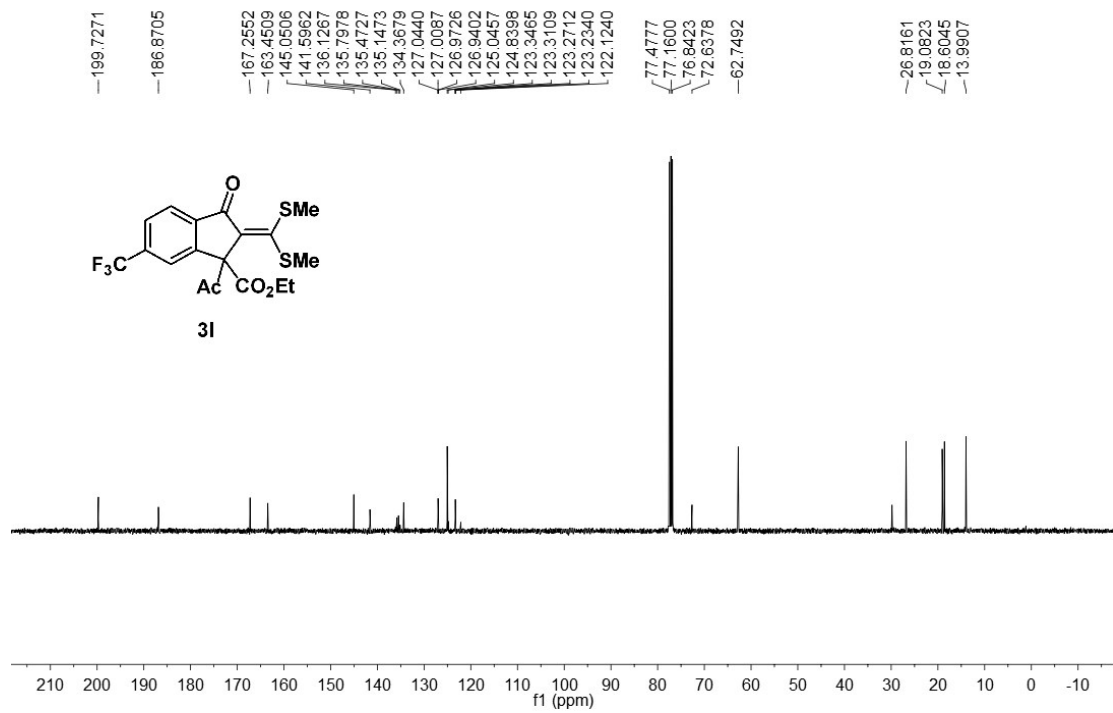



I052  
I052 1H NMR in CDCl3

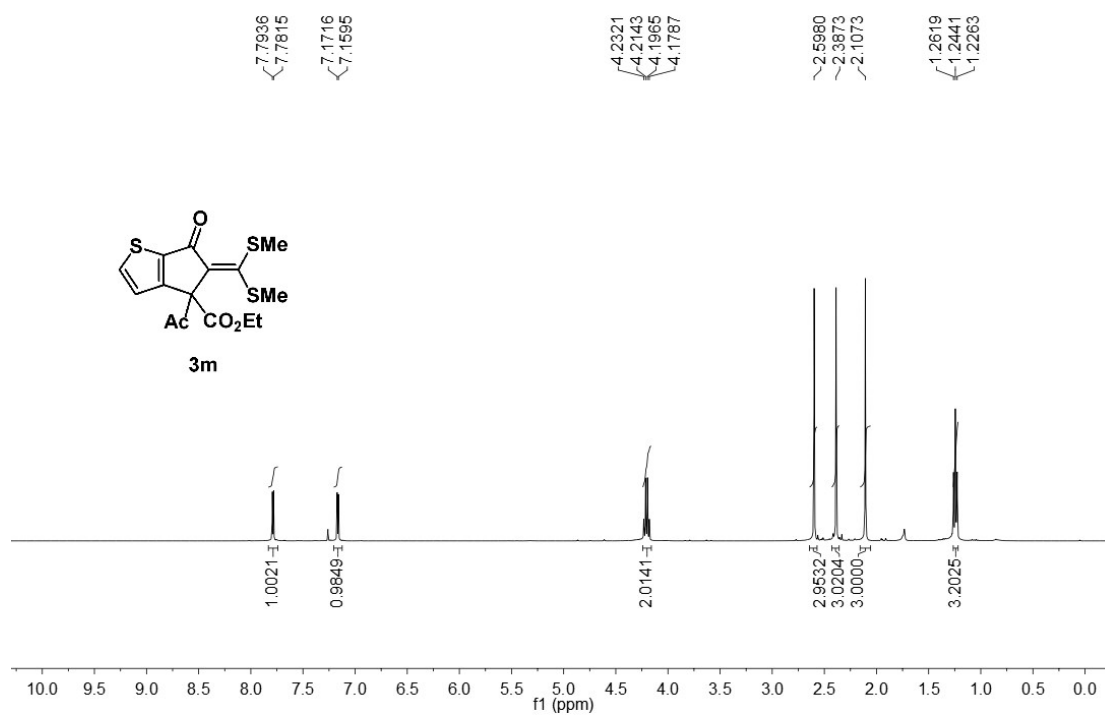

I052  
I052 13C NMR in CDCl3

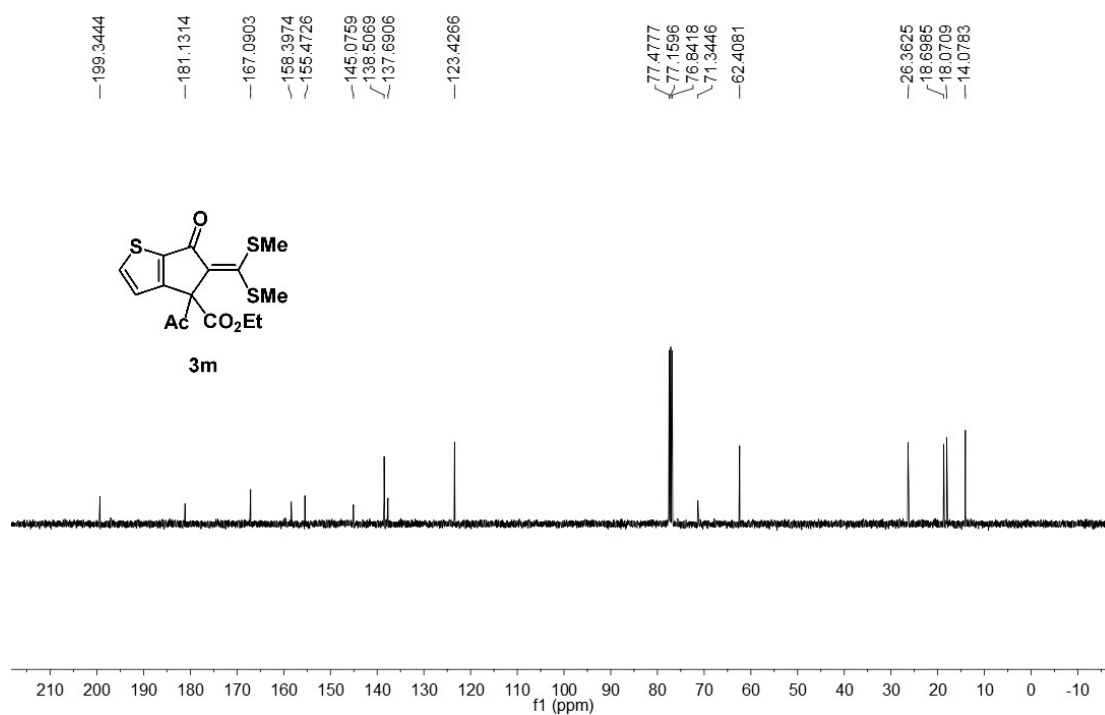

I085  
I085 1H NMR in CDCl3

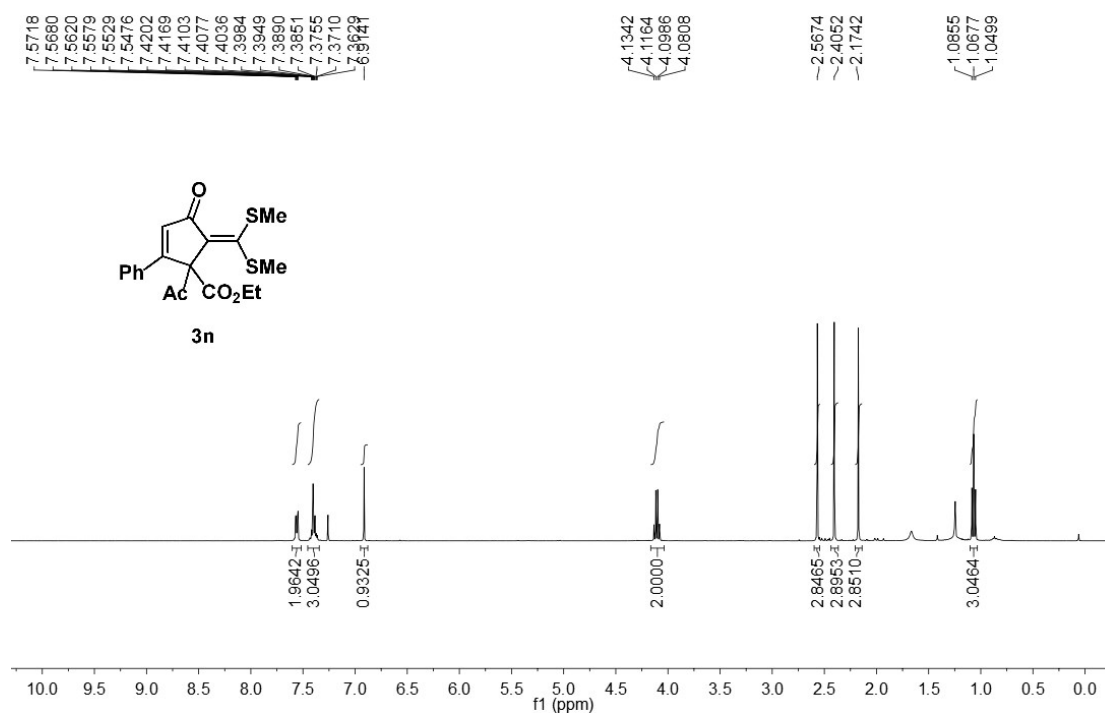

I085  
I085 13C NMR in CDCl3

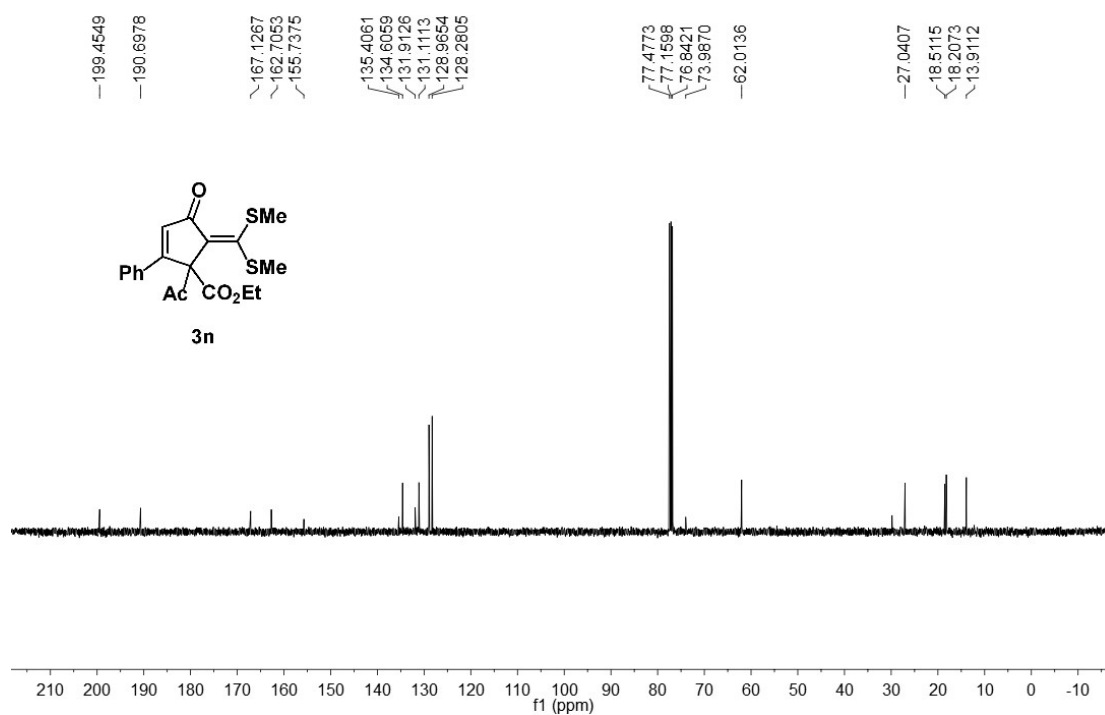

LJ-I025  
LJ-I025-P2 1H NMR

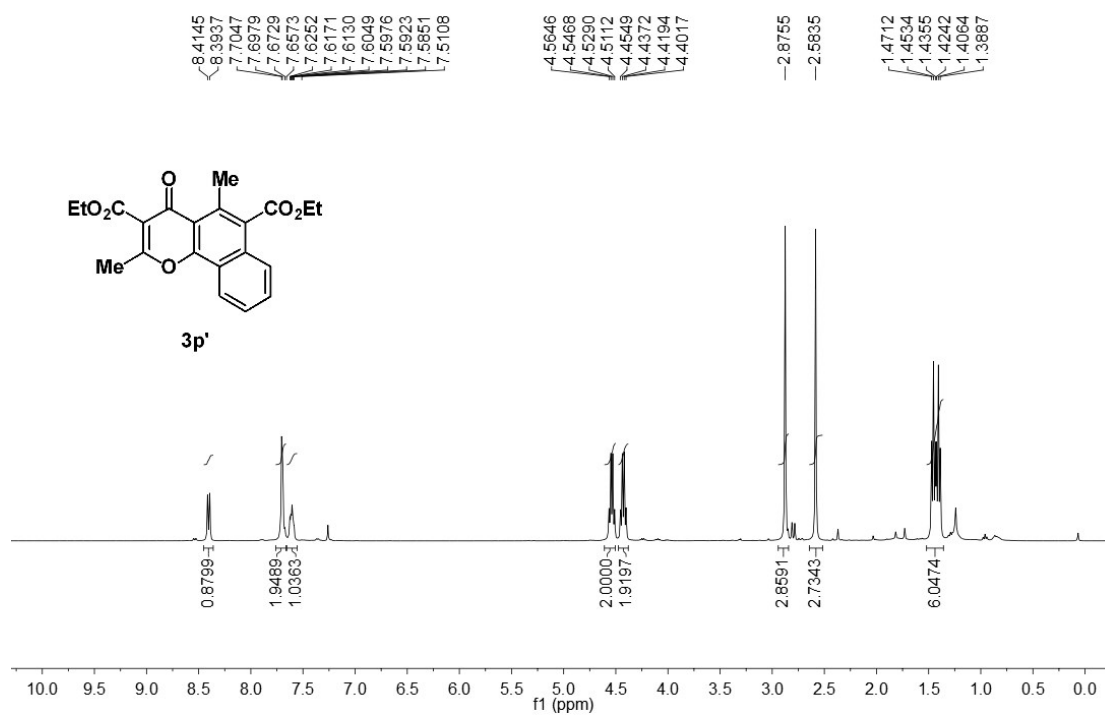

LJ-I025  
LJ-i025-p2 13C NMR

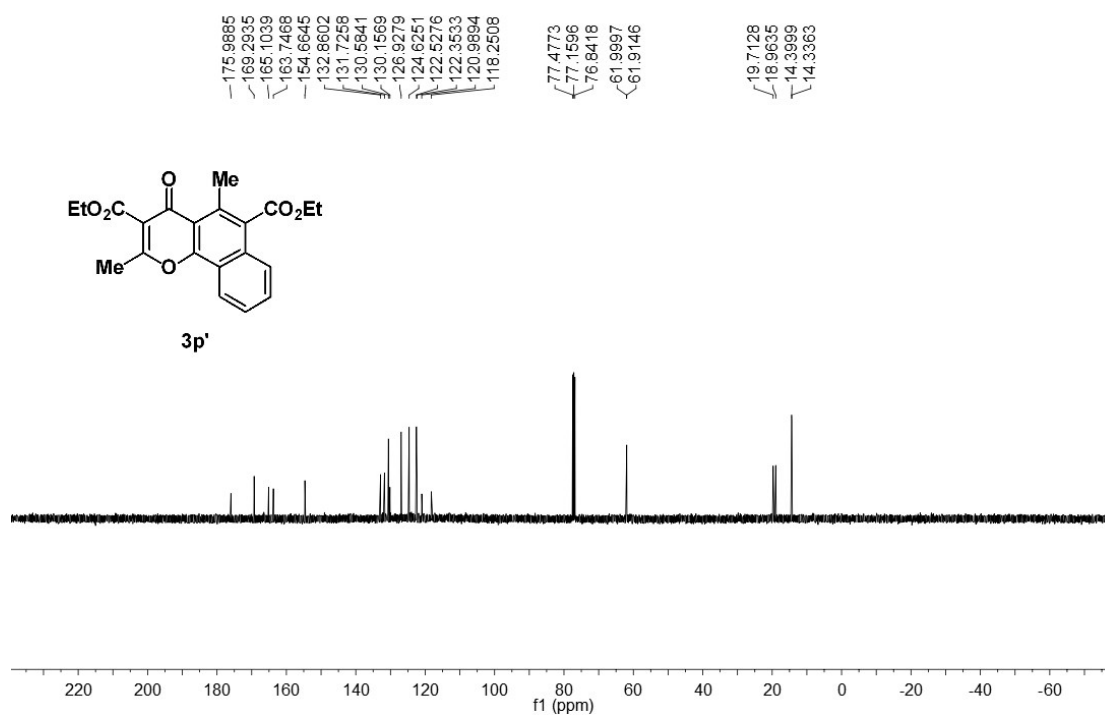

I063  
I063 <sup>1</sup>H NMR in CDCl<sub>3</sub>

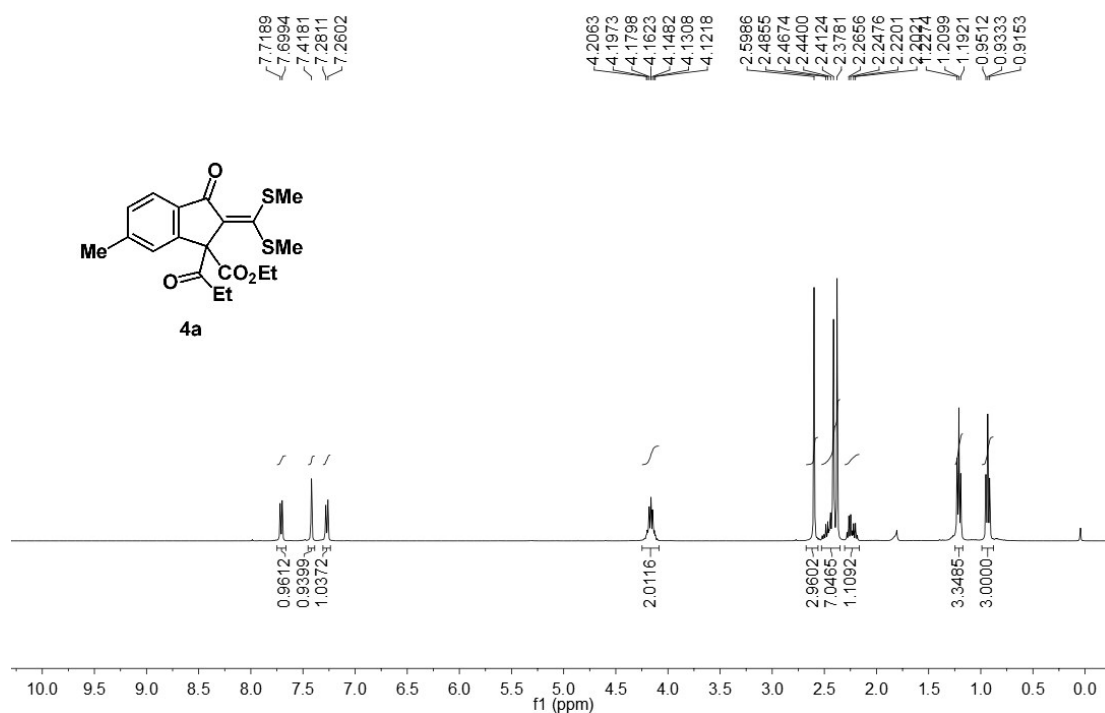

I063  
I063 <sup>13</sup>C NMR in CDCl<sub>3</sub>

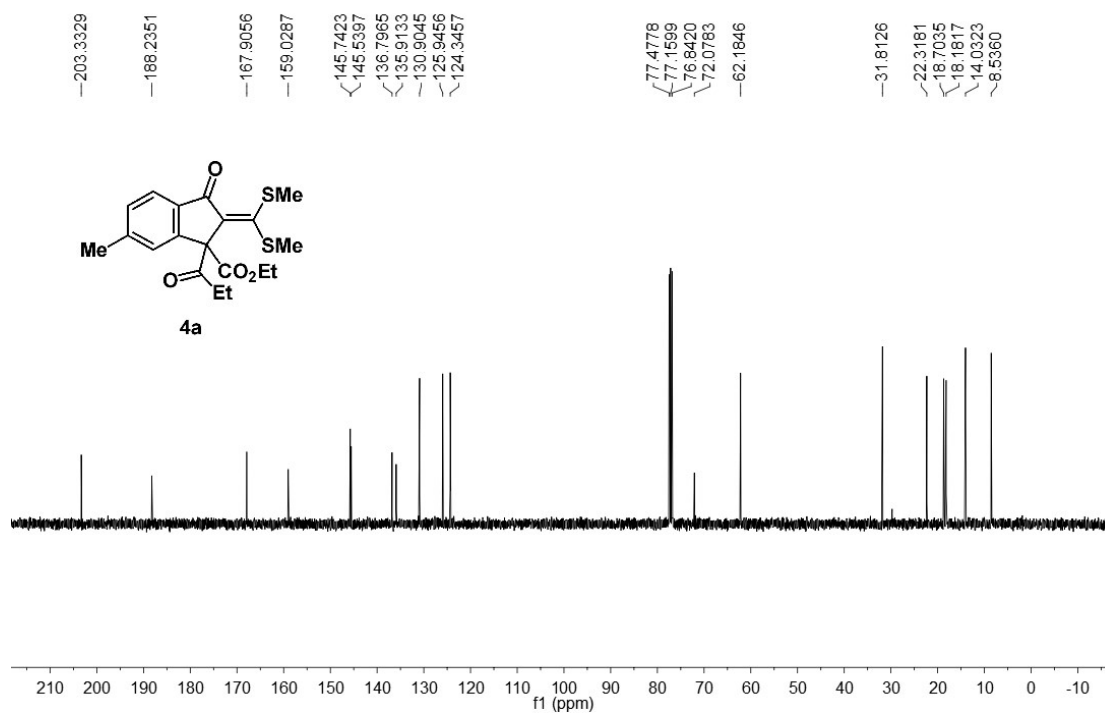

I070  
I070 <sup>1</sup>H NMR in CDCl<sub>3</sub>

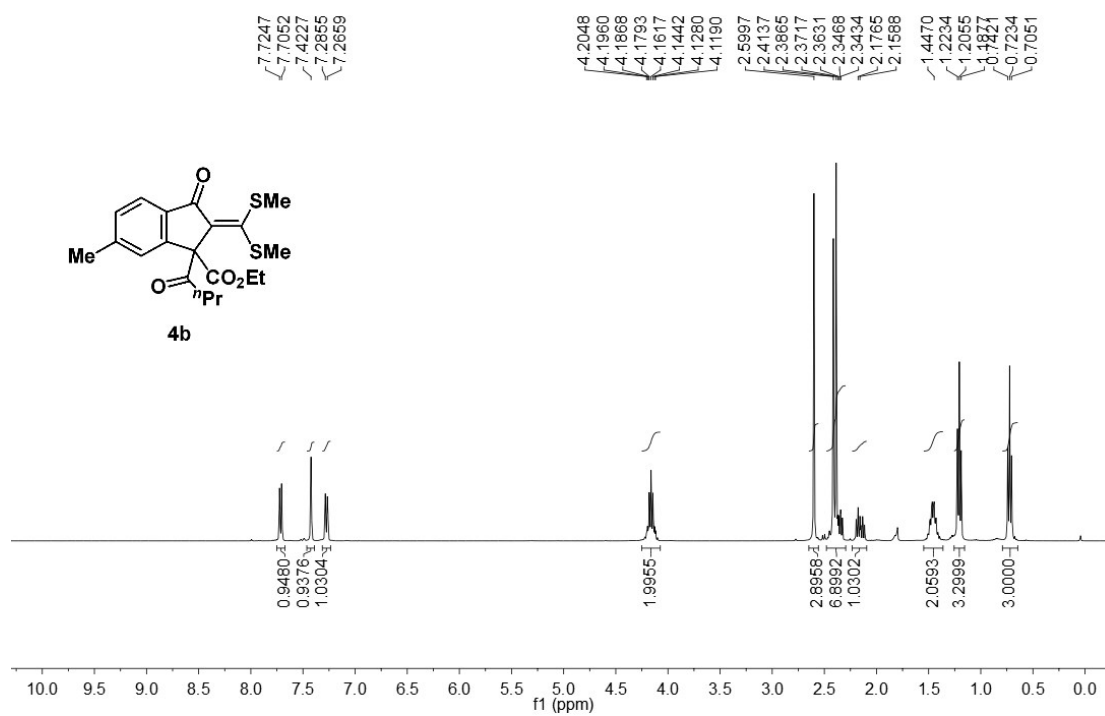

I070  
I070 <sup>13</sup>C NMR in CDCl<sub>3</sub>

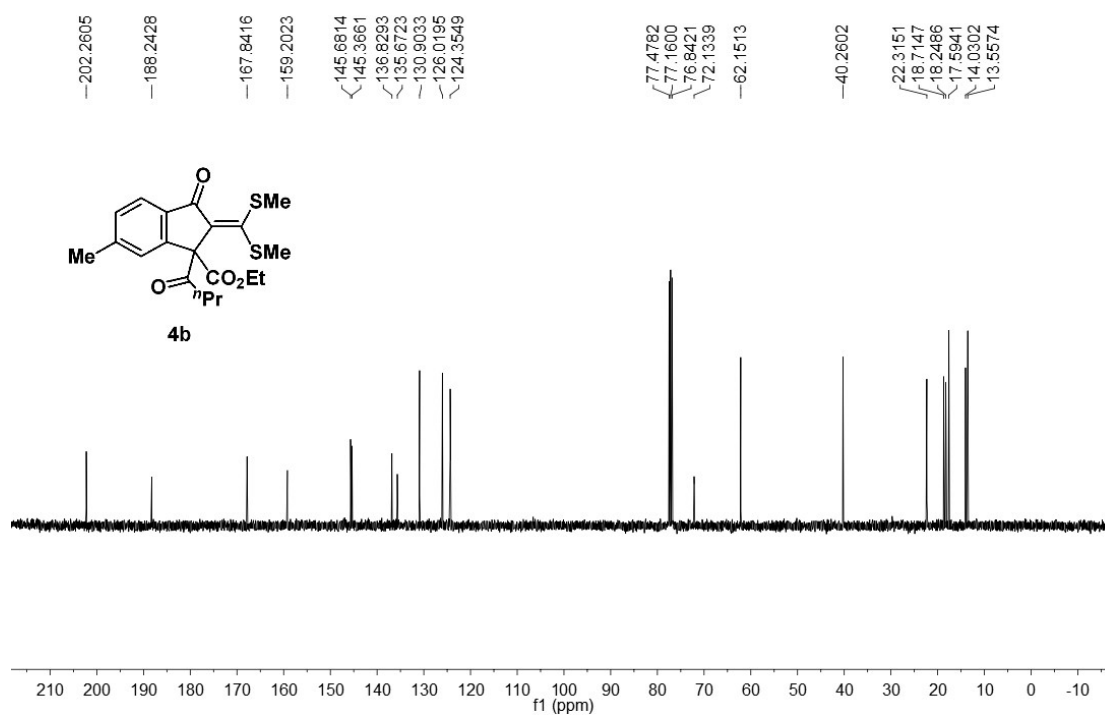

I078  
I078 <sup>1</sup>H NMR in CDCl<sub>3</sub>

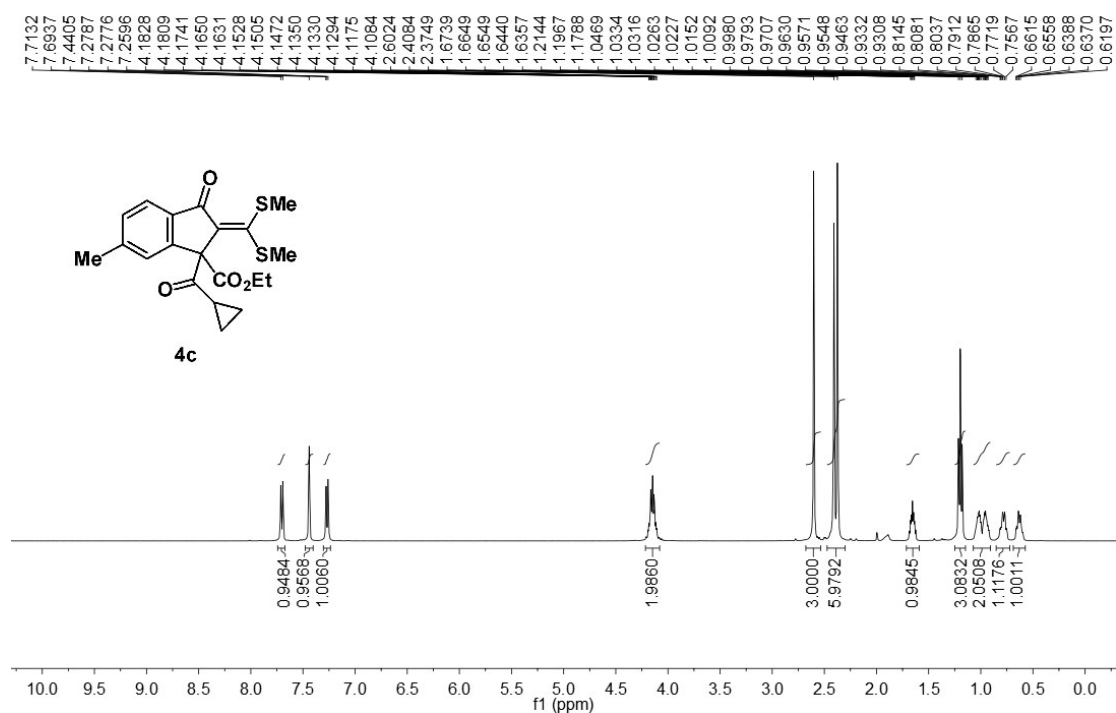

I078  
I078 <sup>13</sup>C NMR in CDCl<sub>3</sub>

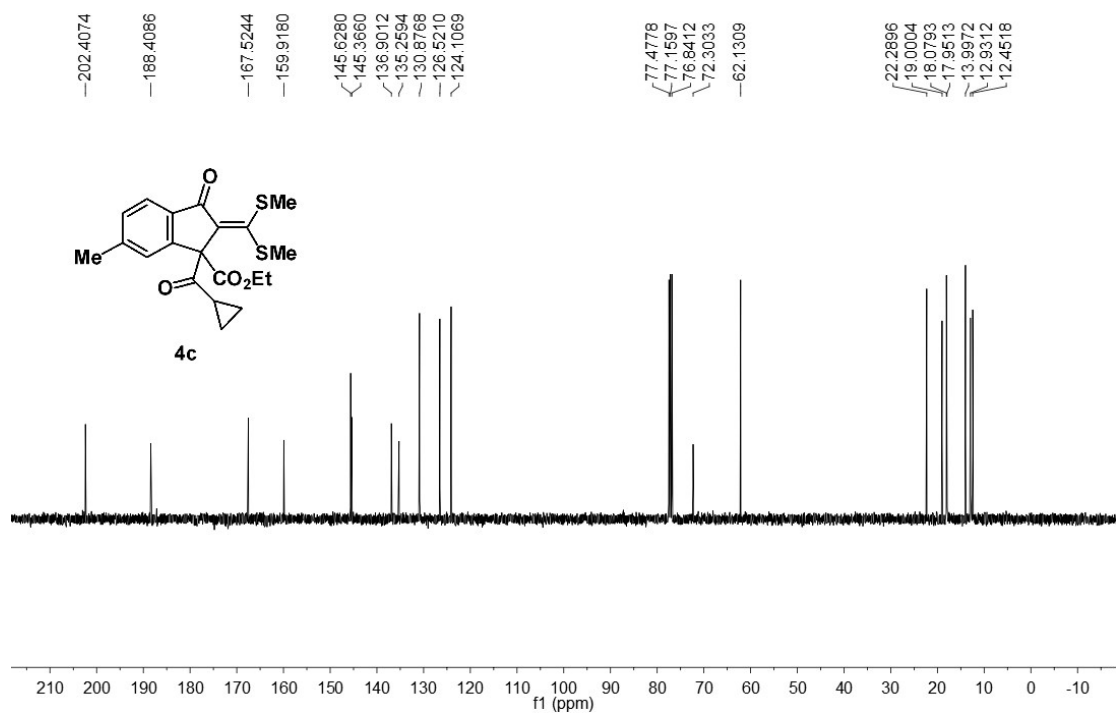

I082  
I082 1H NMR in CDCl3

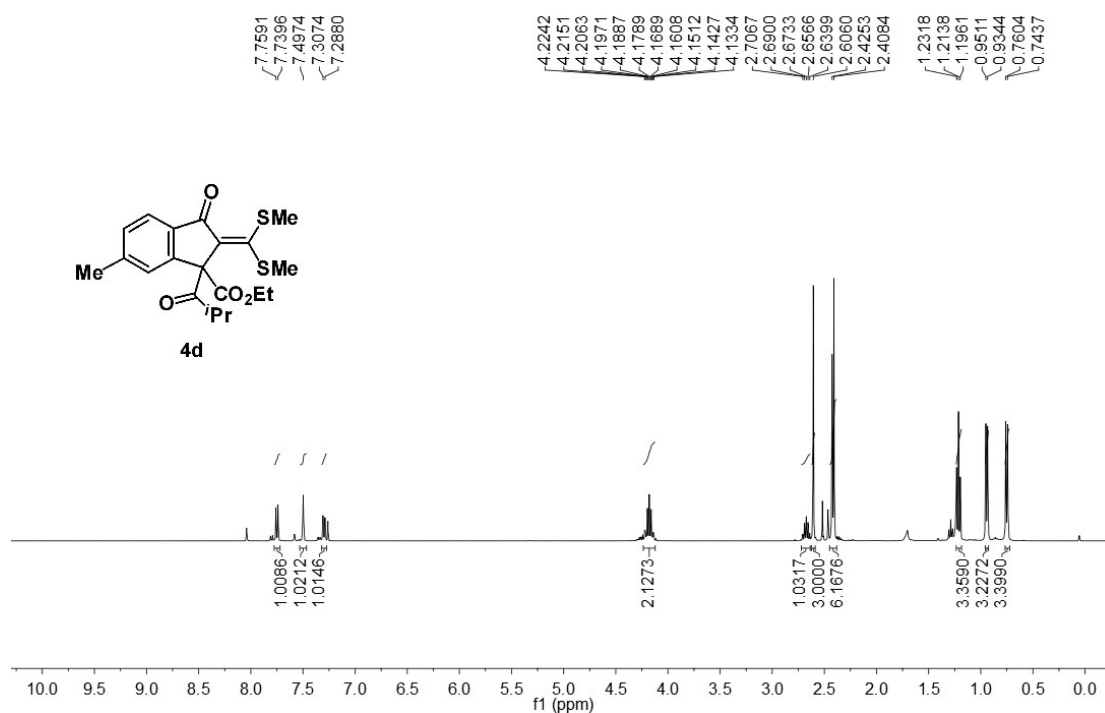

I082  
I082 13C NMR in CDCl3

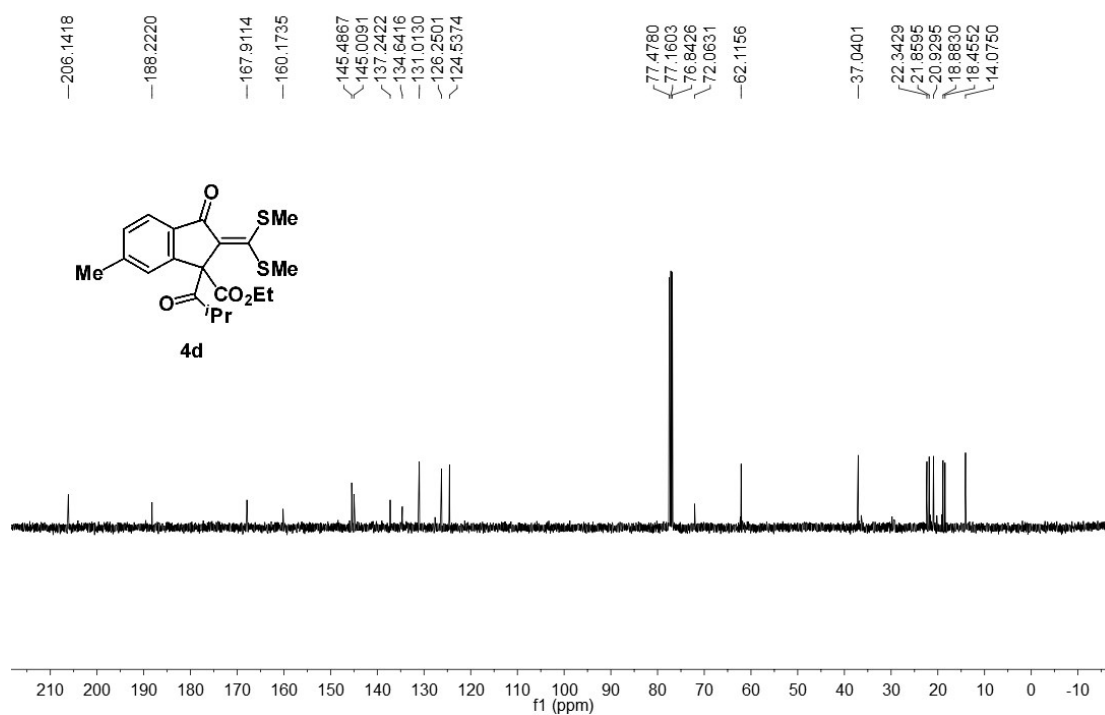

I067  
I067 <sup>1</sup>H NMR in CDCl<sub>3</sub>

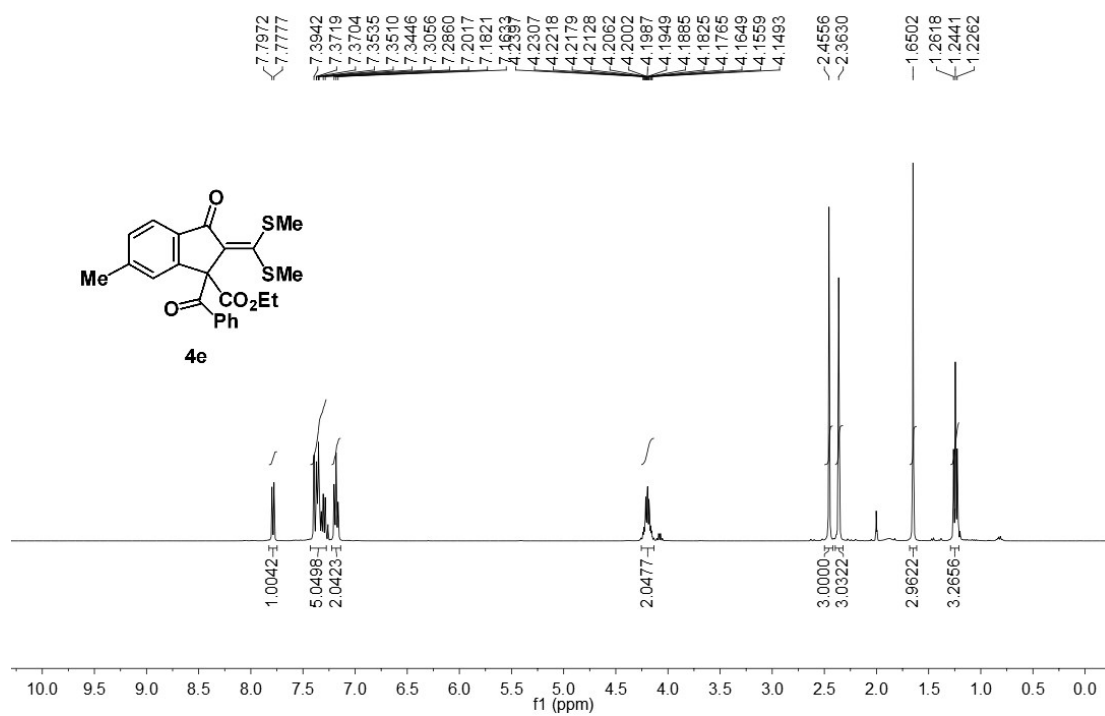

I067  
I067 <sup>13</sup>C NMR in CDCl<sub>3</sub>

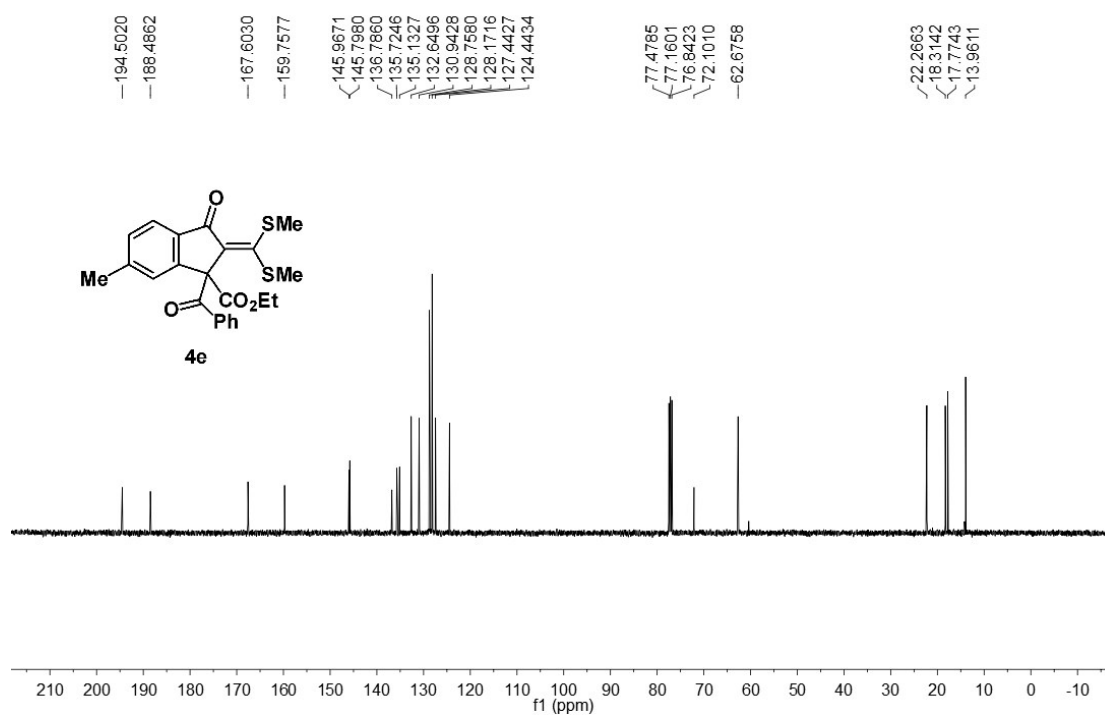



I062  
I062 1H NMR in CDCl3

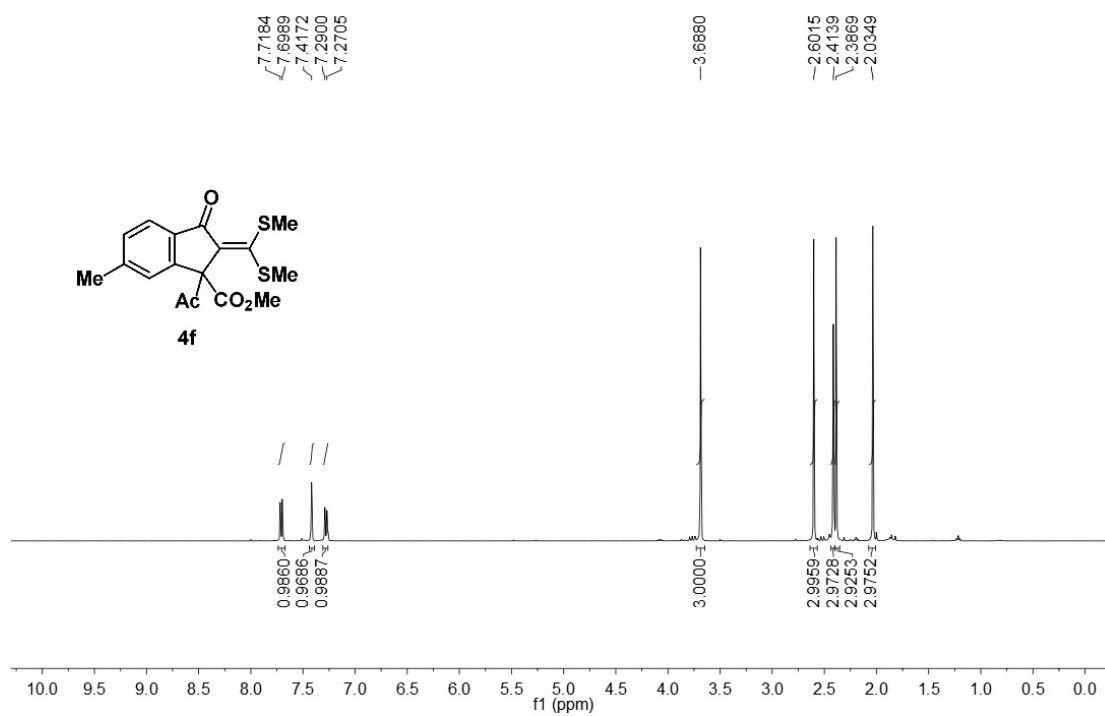

I062  
I062 13C NMR in CDCl3

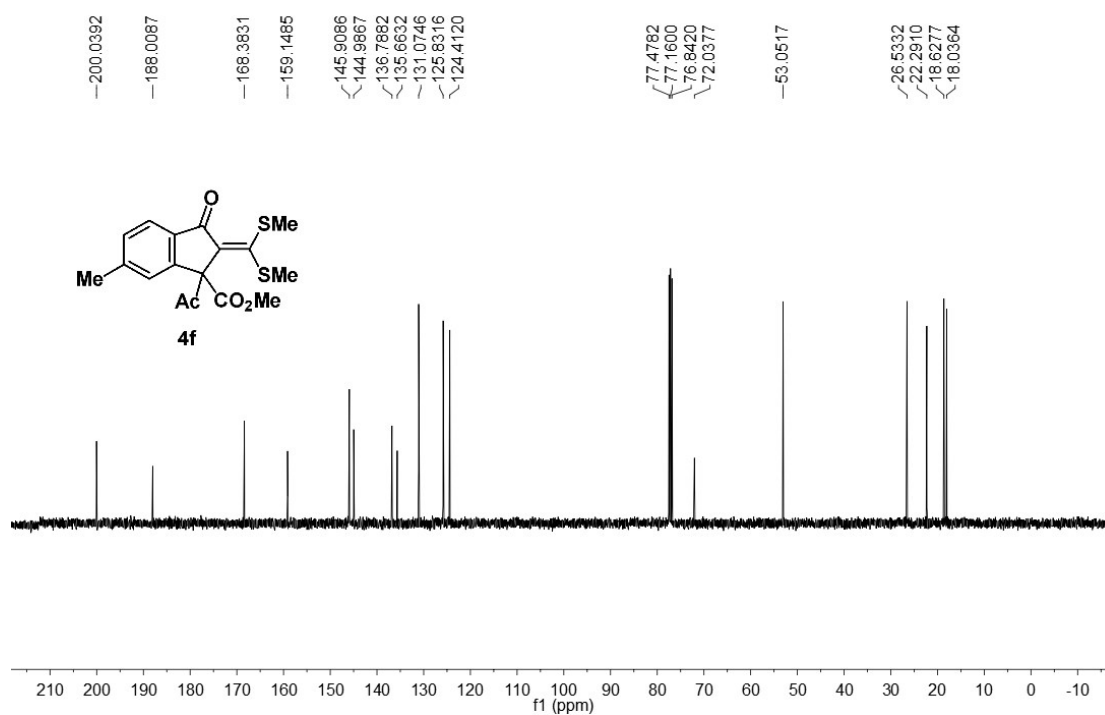

I056  
I056 <sup>1</sup>H NMR in CDCl<sub>3</sub>

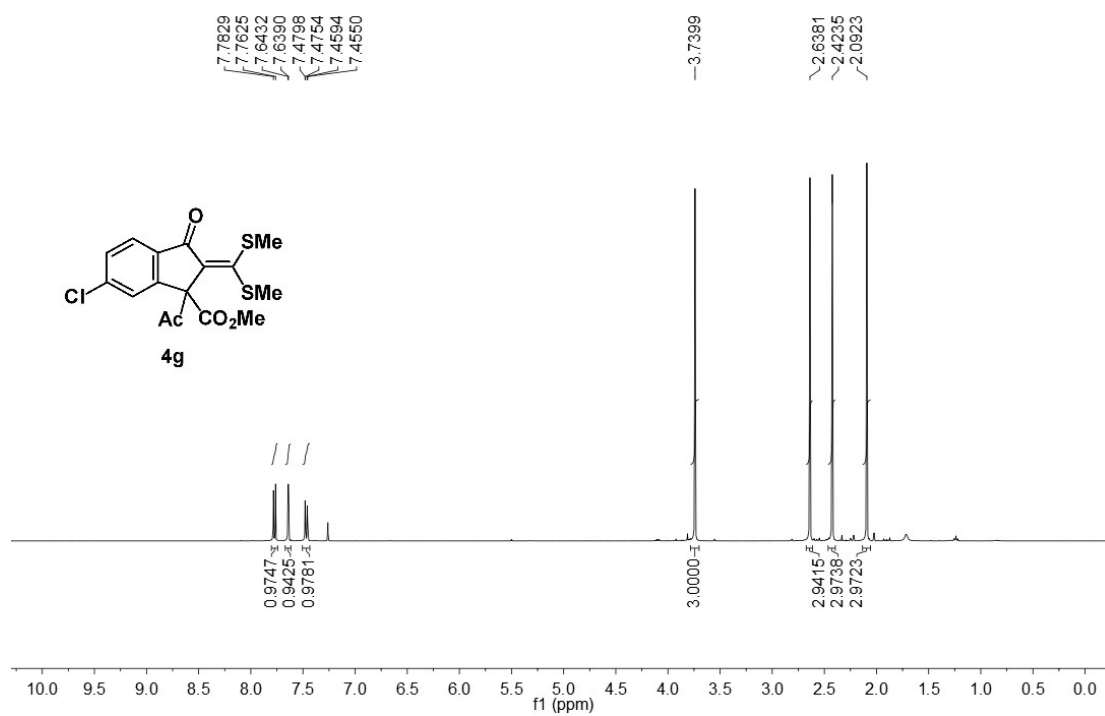

I056  
I056 <sup>13</sup>C NMR in CDCl<sub>3</sub>

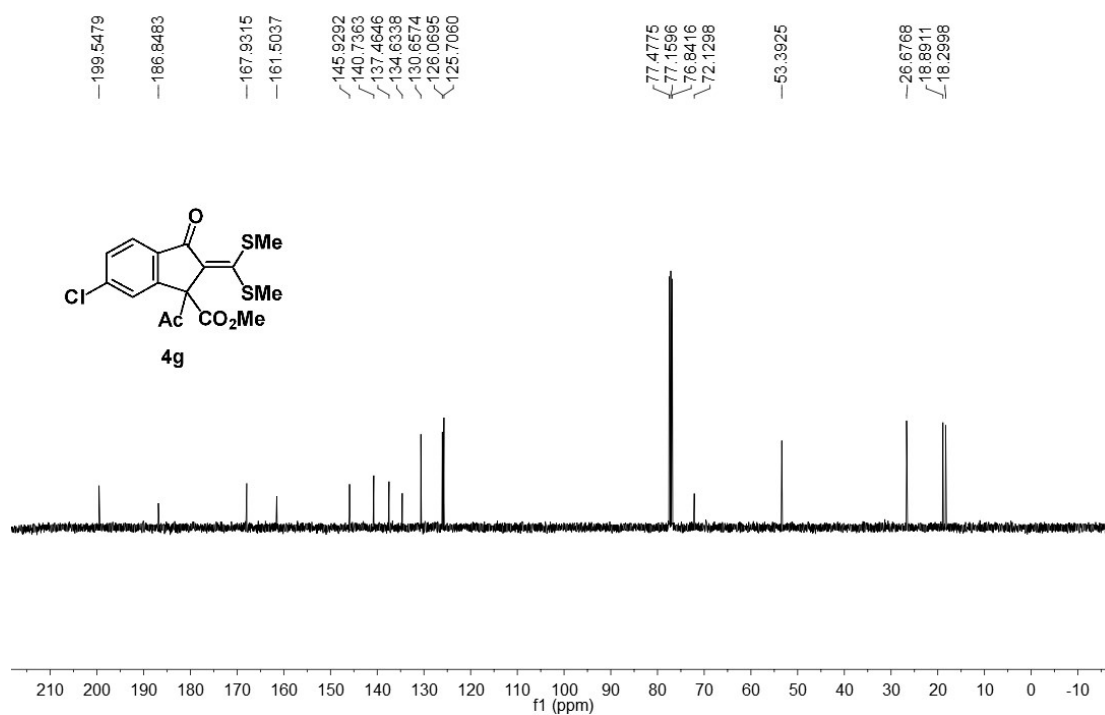

I066  
I066 1H NMR in CDCl3

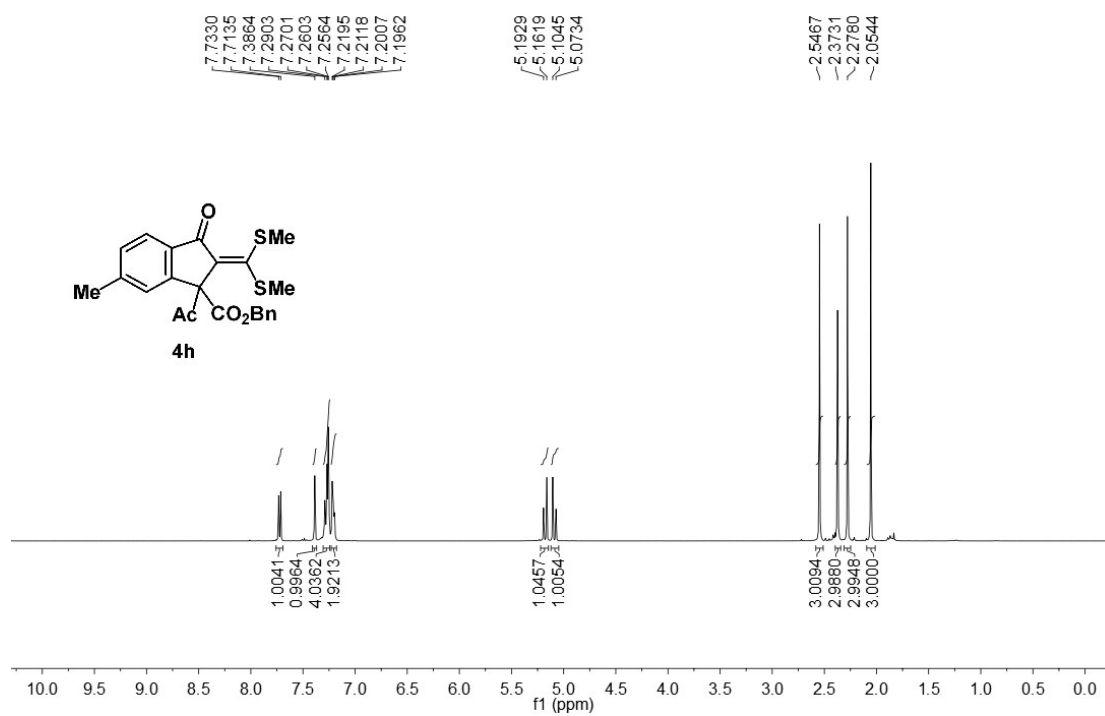

I066  
I066 13C NMR in CDCl3

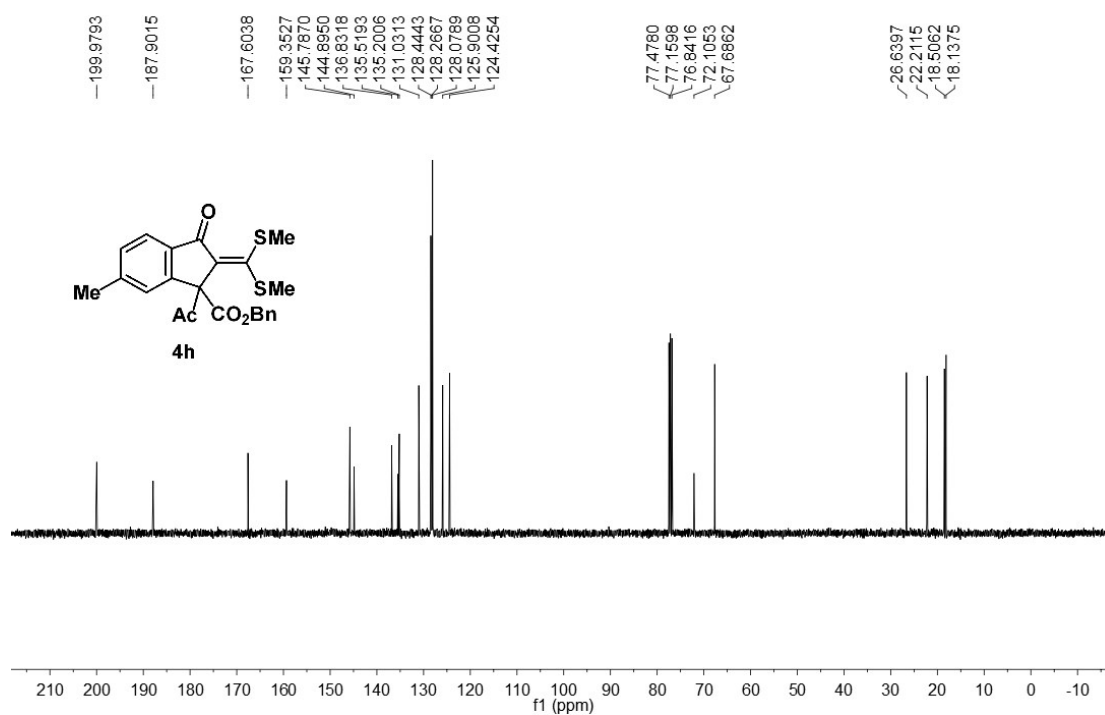

I071  
I071 1H NMR in CDCl3

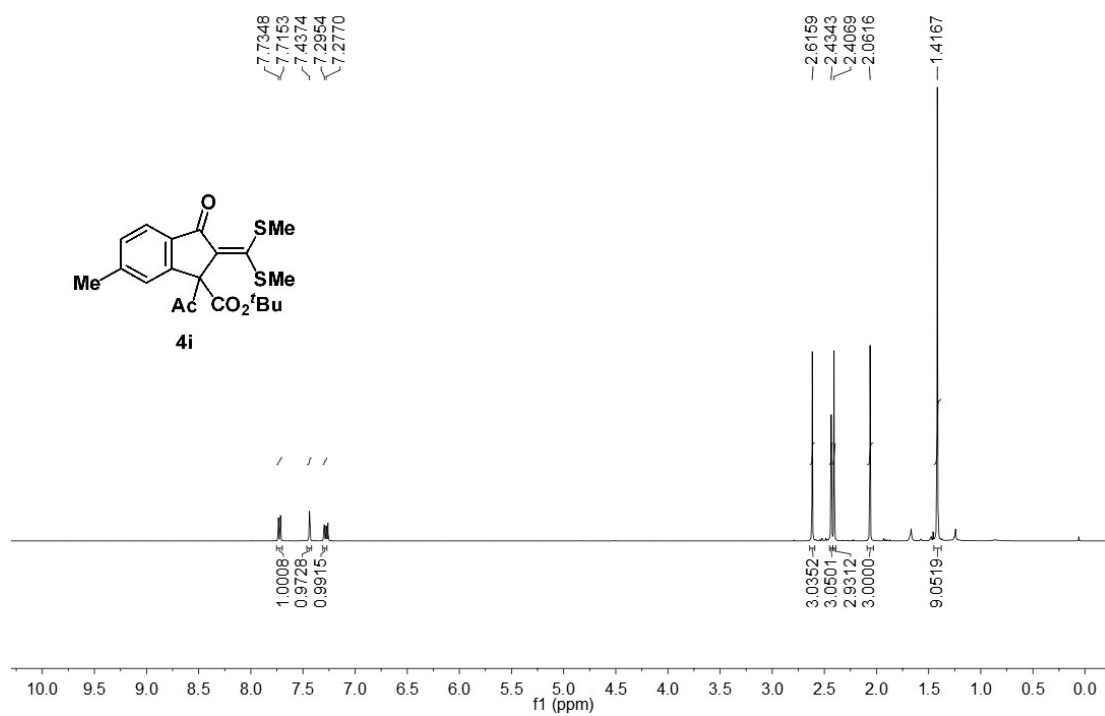

I071  
I071 13C NMR in CDCl3

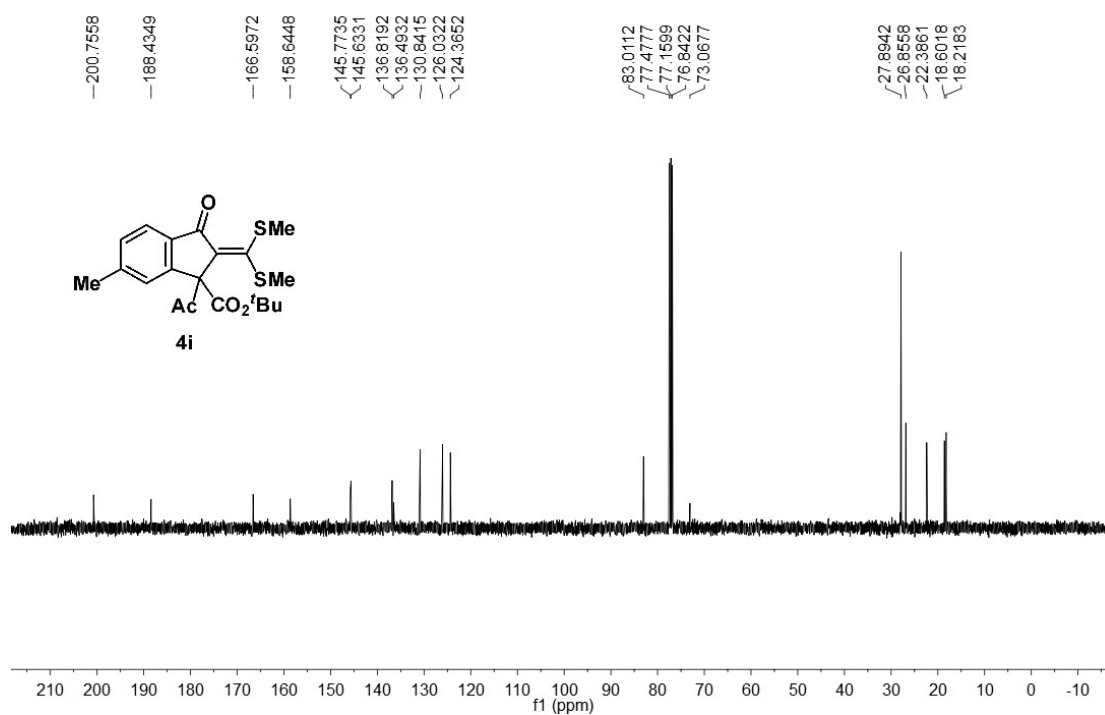

Supplement: d1qo00056j1.pdf [file d1qo00056j1.pdf]
